# Supplementary material for: Palladium-catalyzed allylation of tautomerizable heterocycles with alkynes
Source: Royal Society of Chemistry journal article supplement (doi:10.1039/c7ob01119a), 2017-01-01

## Supporting Information for:

# Palladium-Catalyzed Allylation of Tautomerizable Heterocycles with Alkynes

Chuan-Jun Lu,<sup>\*a</sup> Dong-Kai Chen,<sup>a</sup> Hong Chen,<sup>a</sup> Hong Wang,<sup>a</sup> Hongwei Jin,<sup>a</sup> Xifu Huang<sup>b</sup> and  
Jianrong Gao<sup>a</sup>

<sup>a</sup>College of Chemical Engineering, Zhejiang University of Technology, Hangzhou 310014, China

<sup>b</sup>Ningbo Detai Chemical Co., Ltd

|                                                                               |      |
|-------------------------------------------------------------------------------|------|
| Copies of <sup>1</sup> H NMR Spectra of the Alkynes.....                      | 2-5  |
| Copies of <sup>1</sup> H and <sup>13</sup> C NMR Spectra of the Products..... | 5-31 |

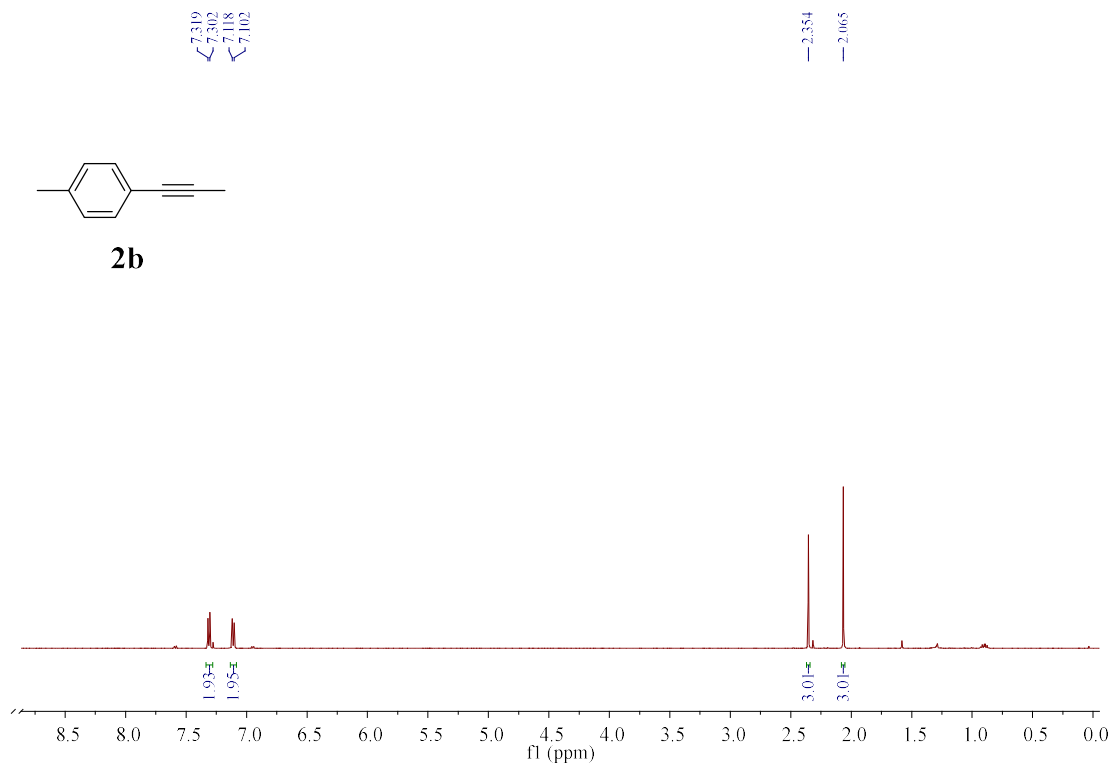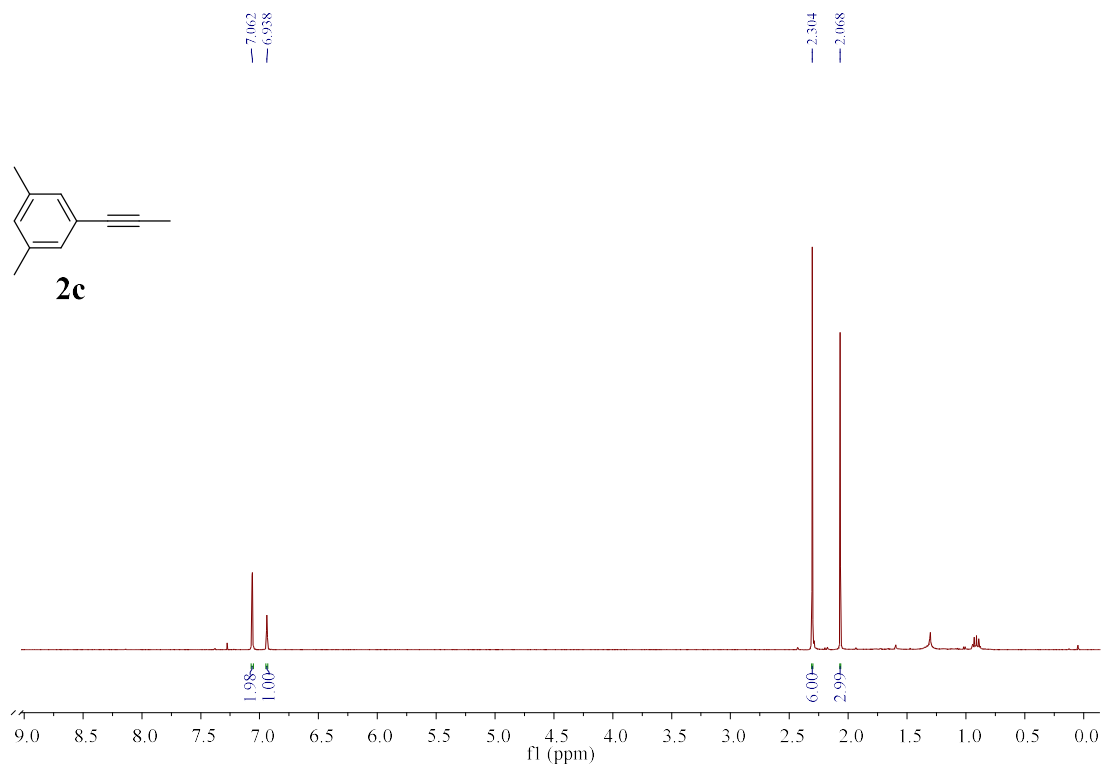

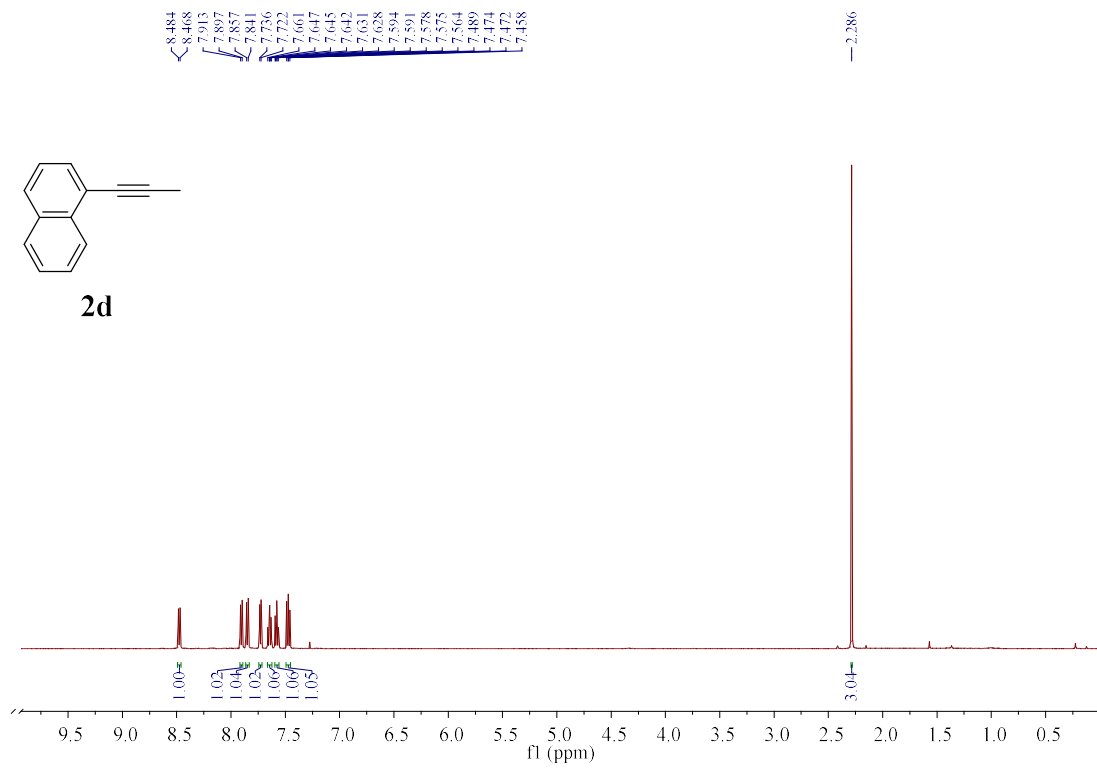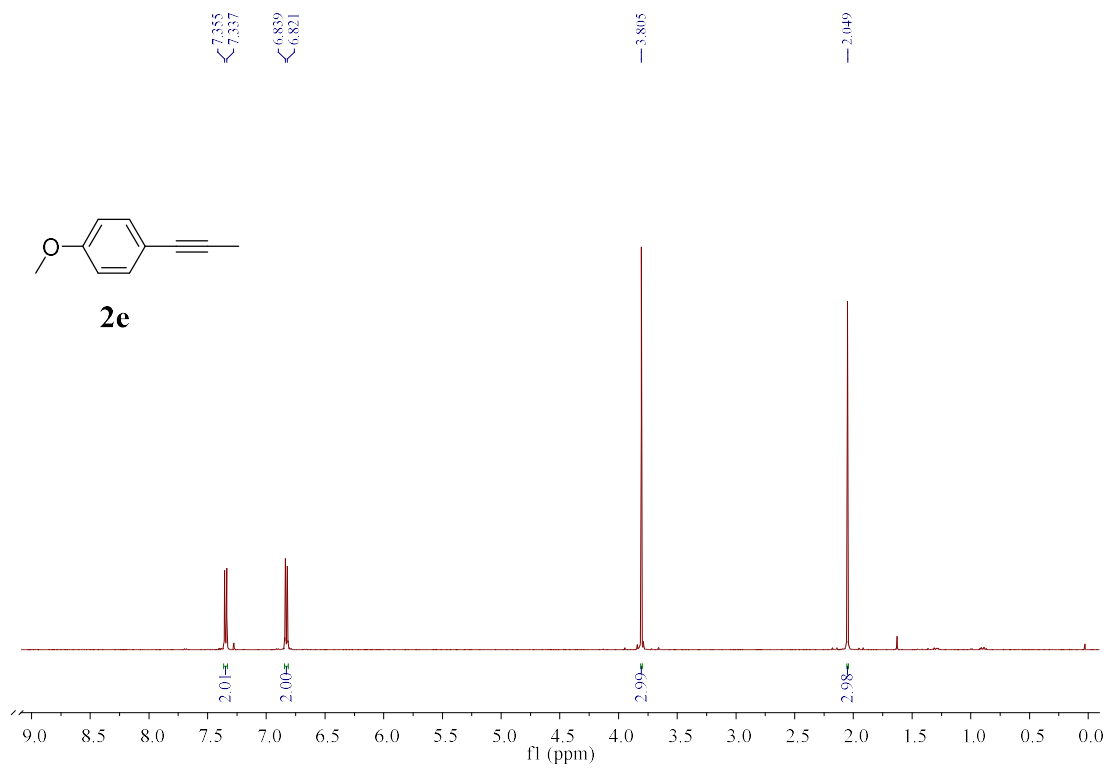

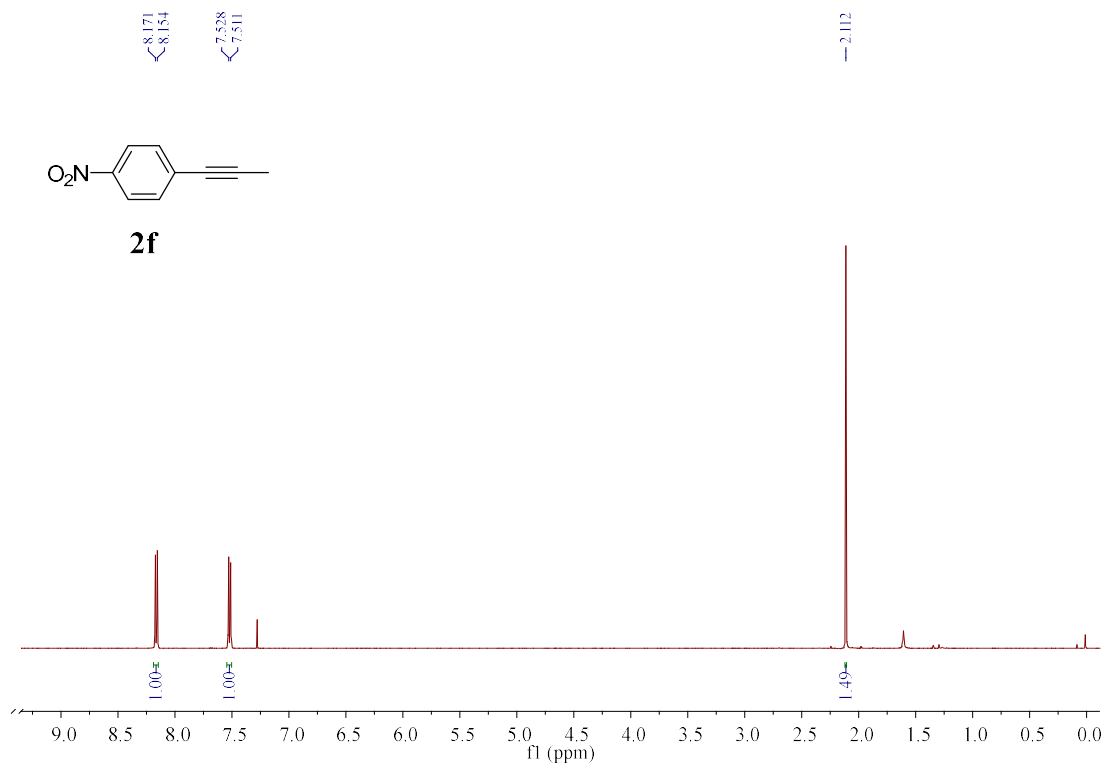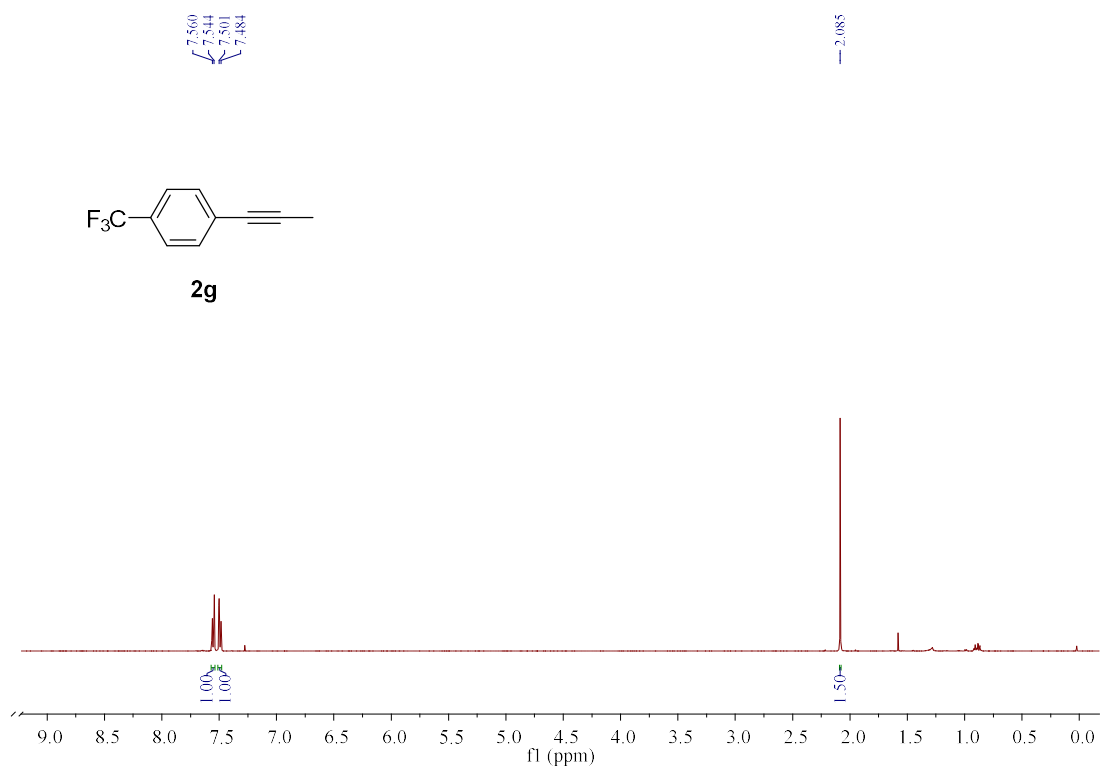

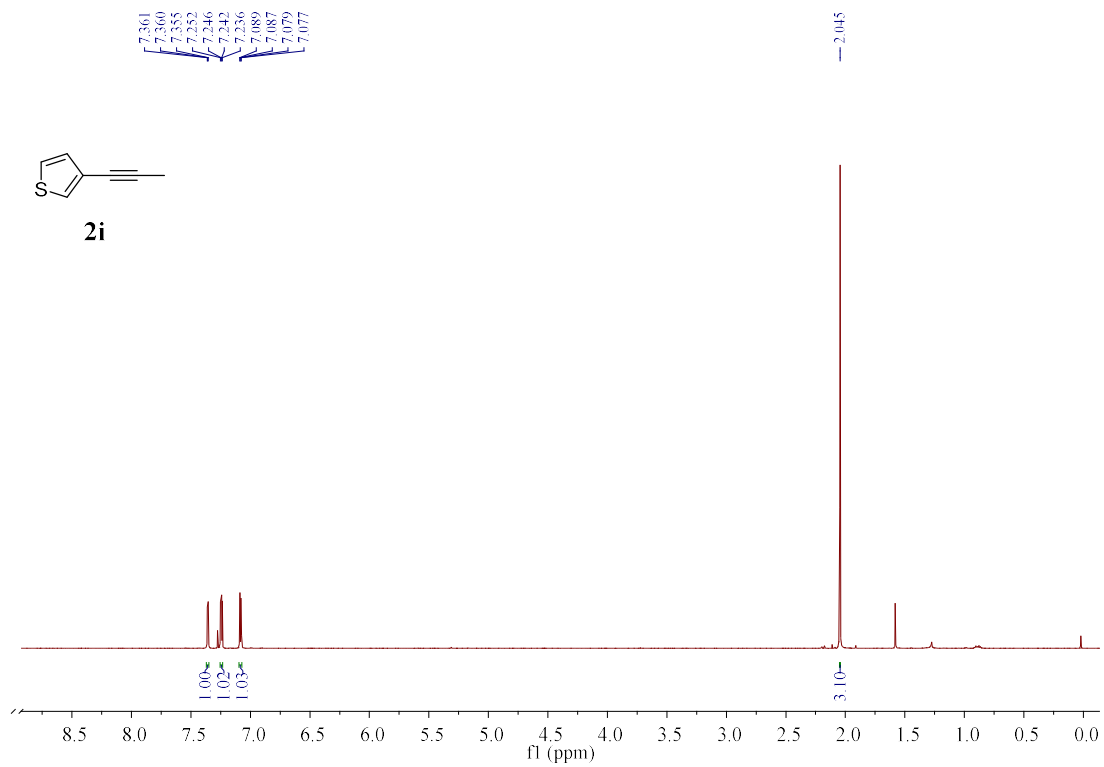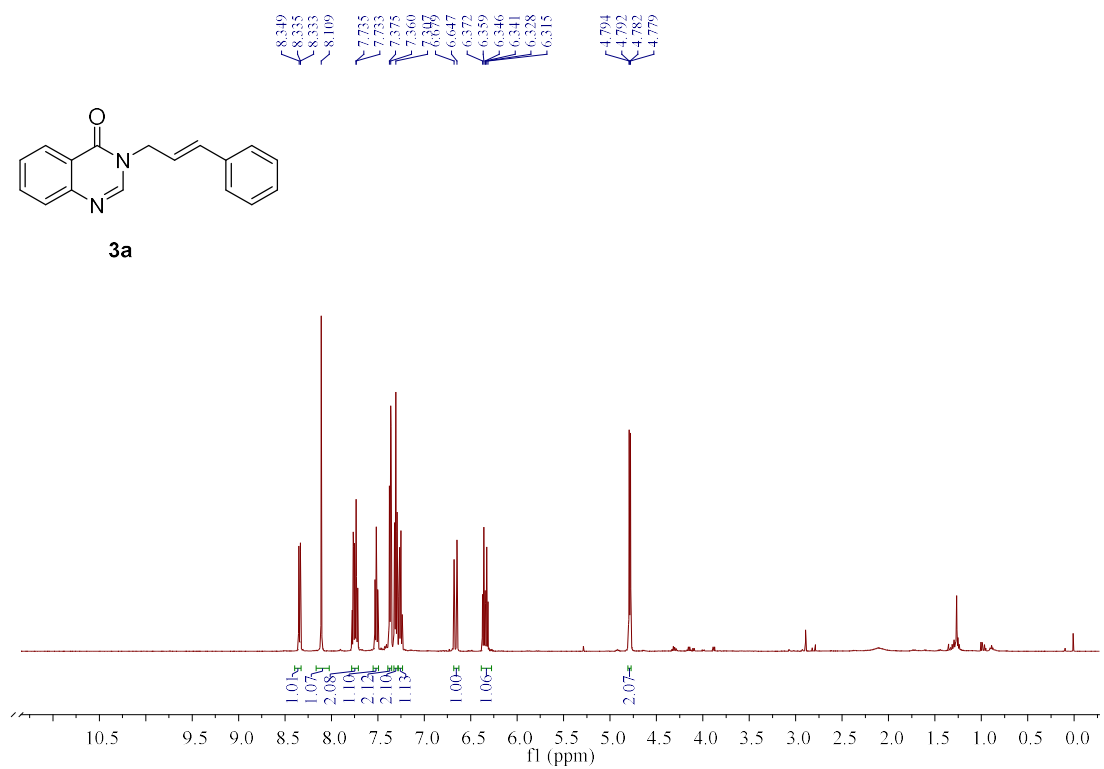

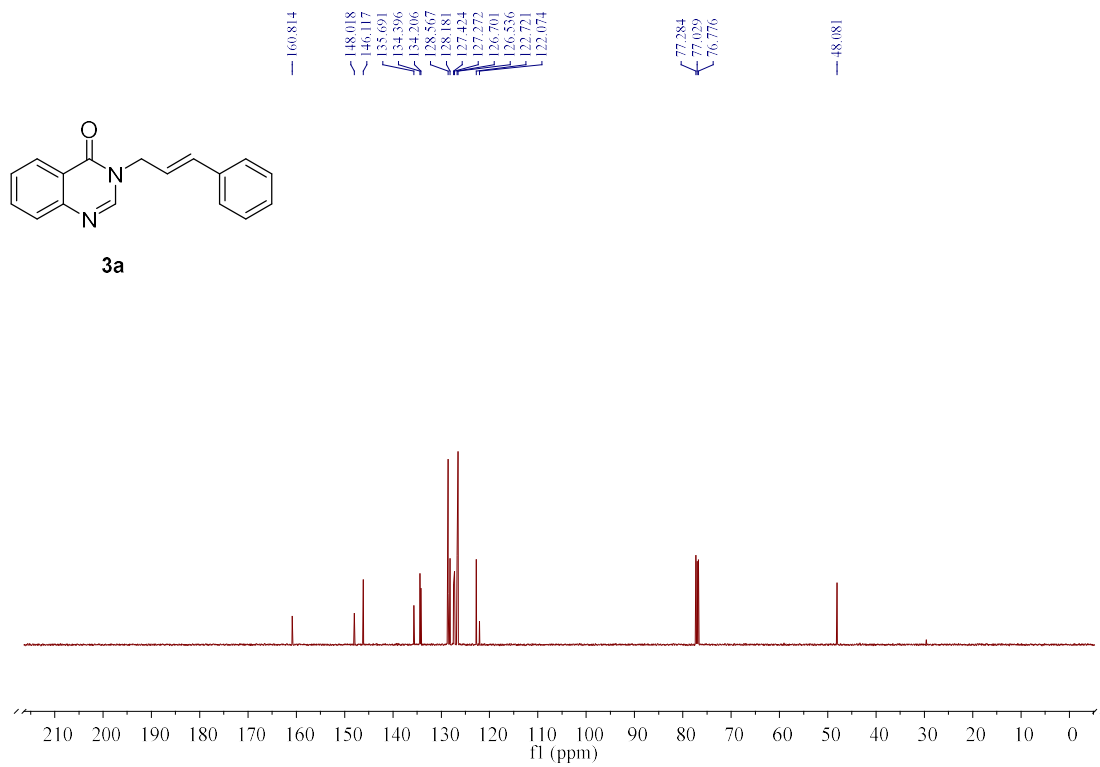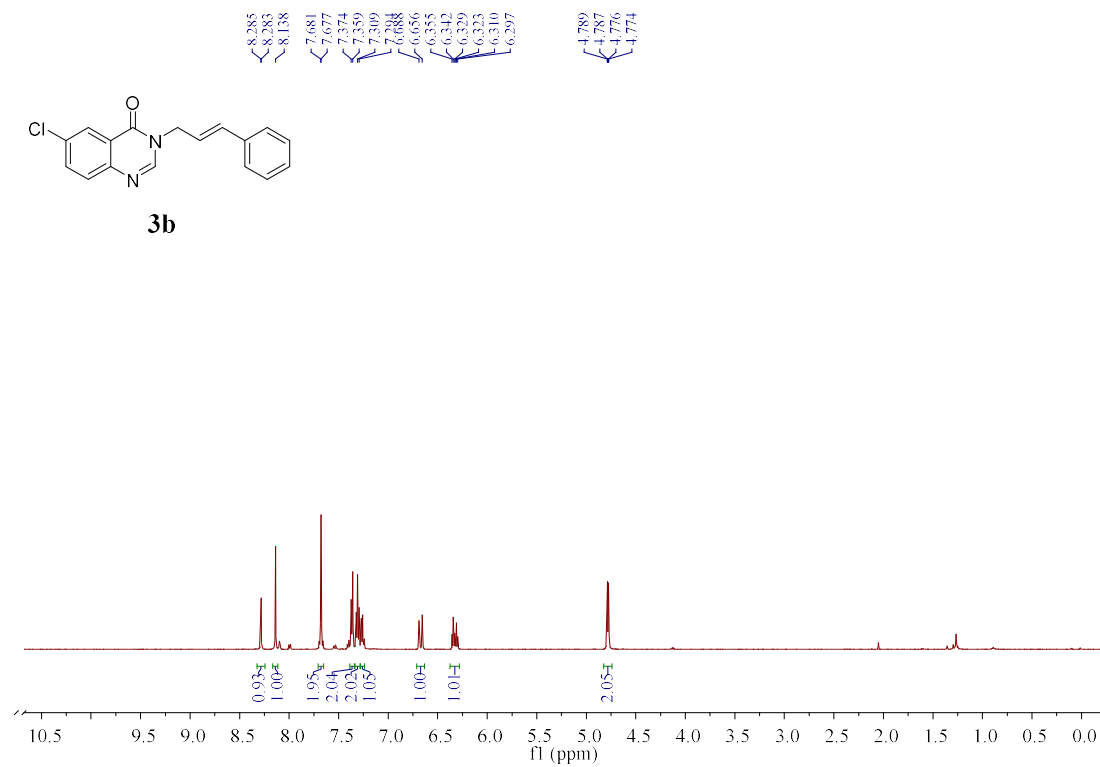

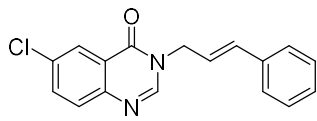

**3b**

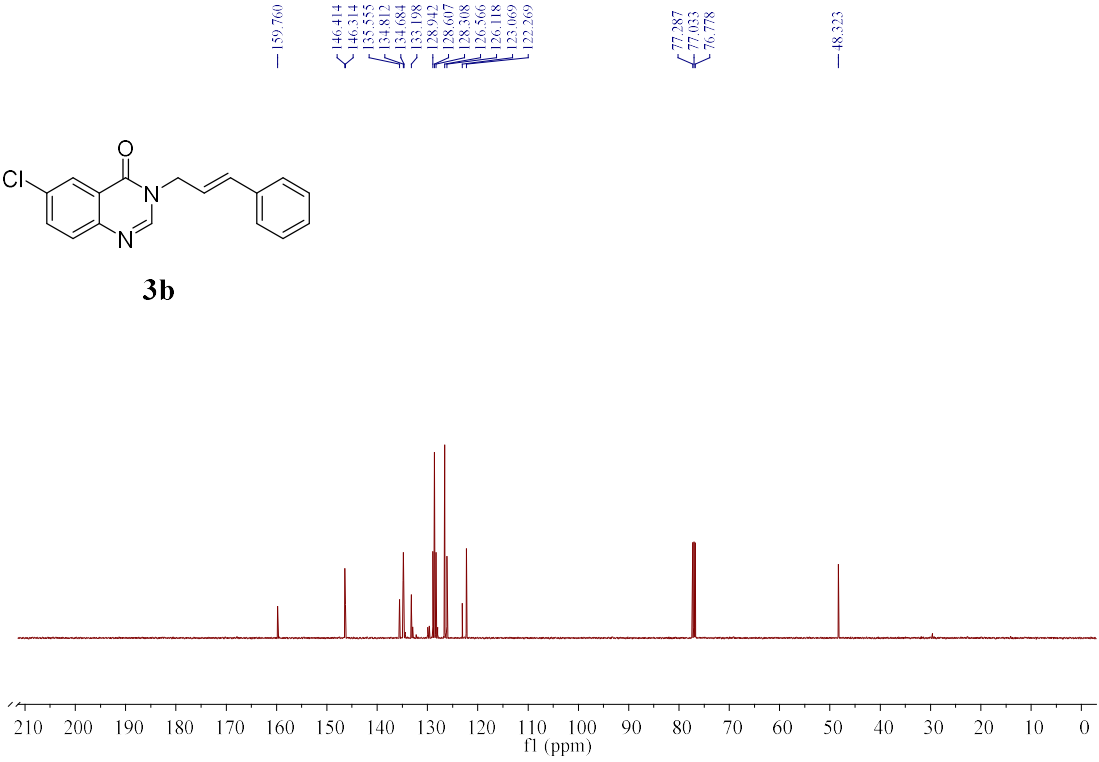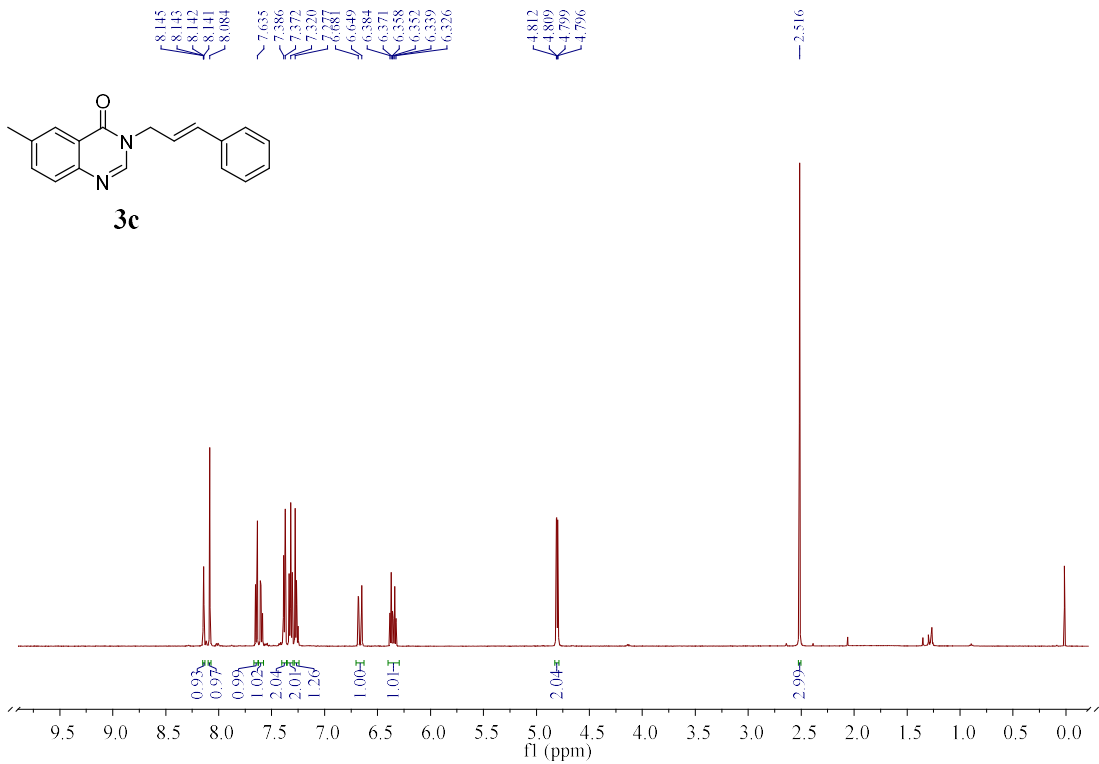

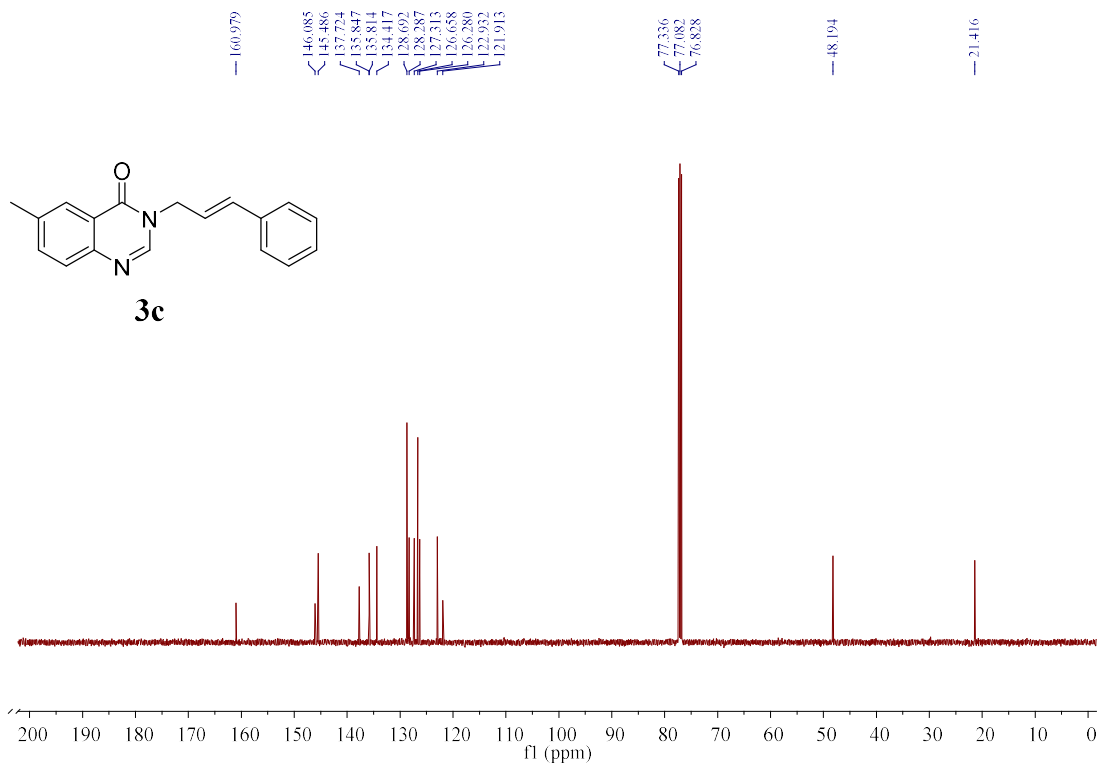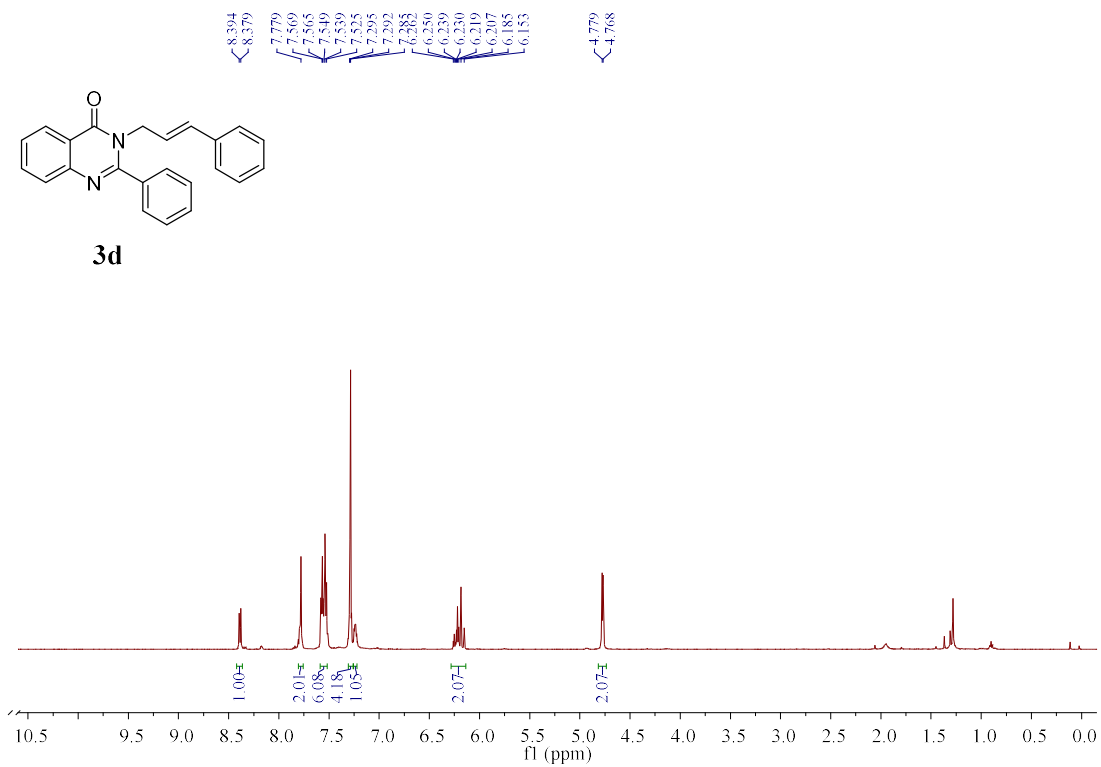



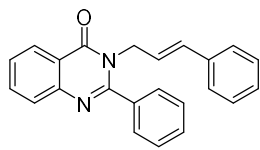

3d

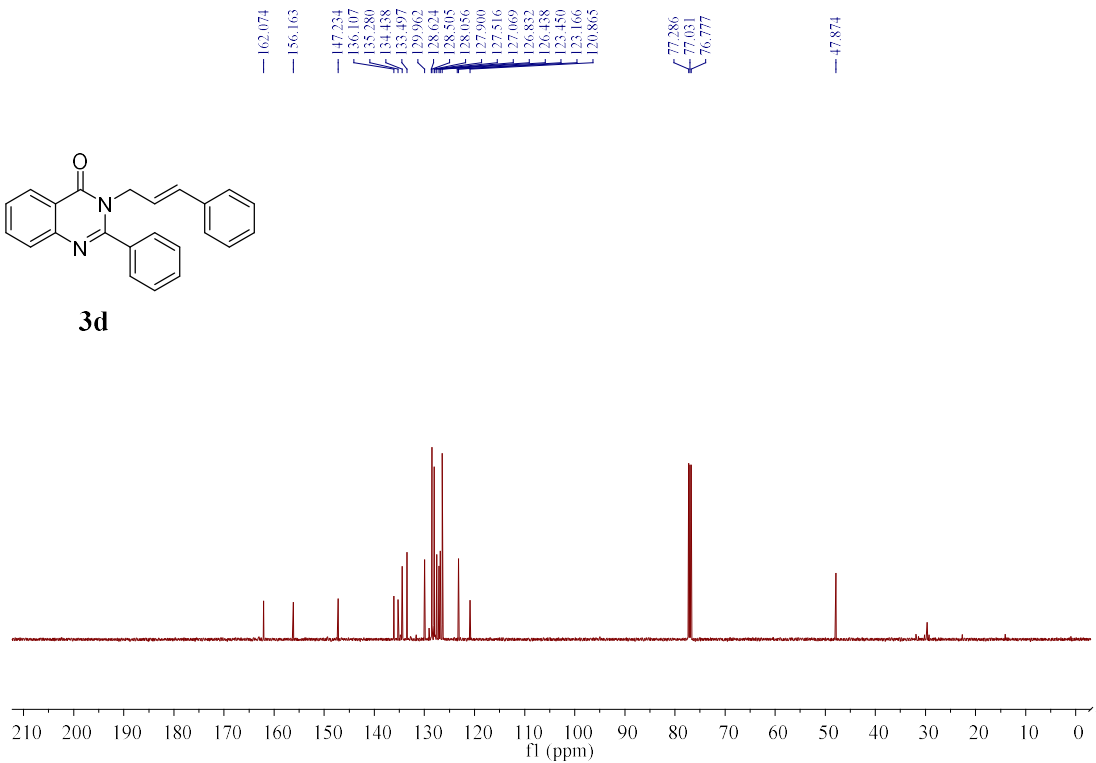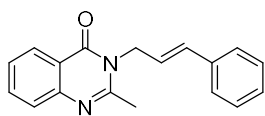

3e

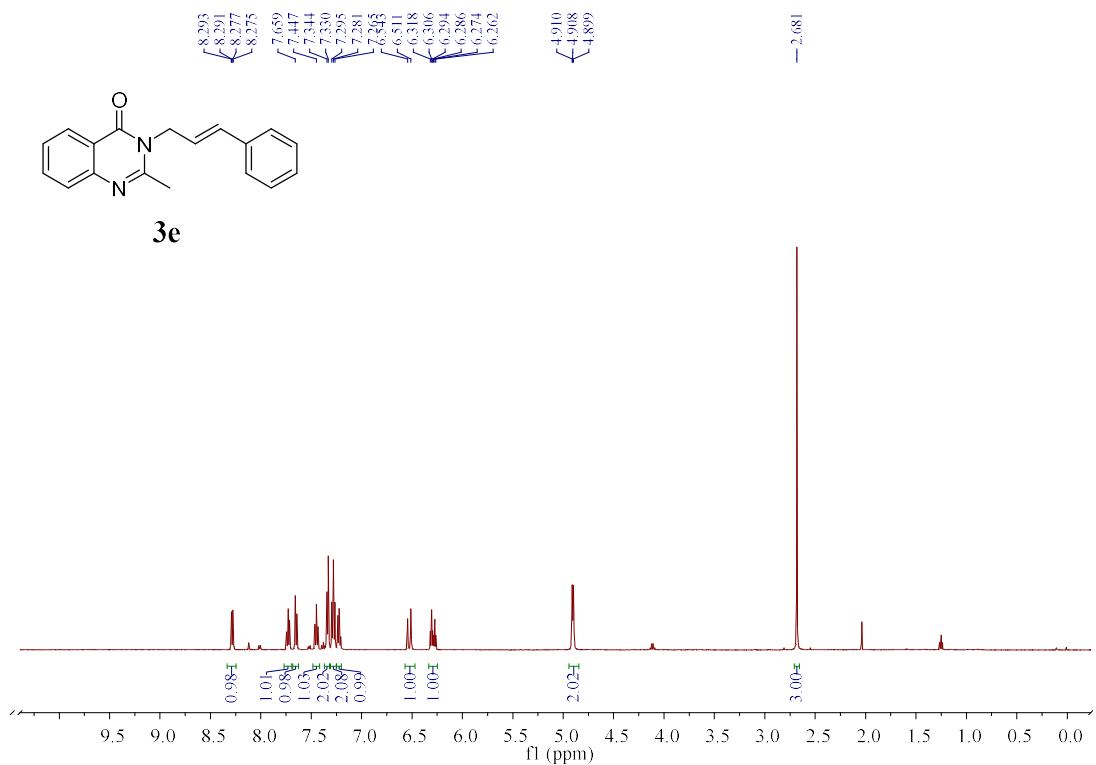

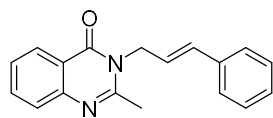

**3e**

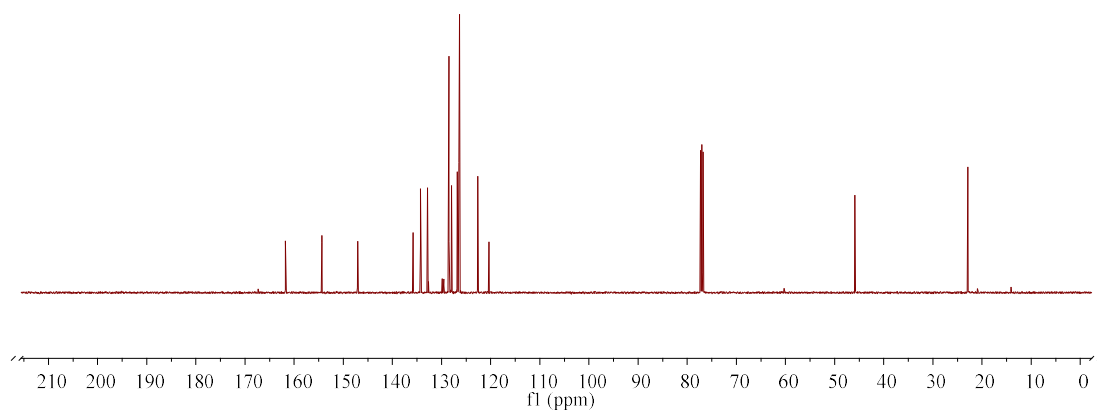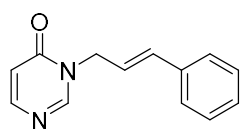

**3f**

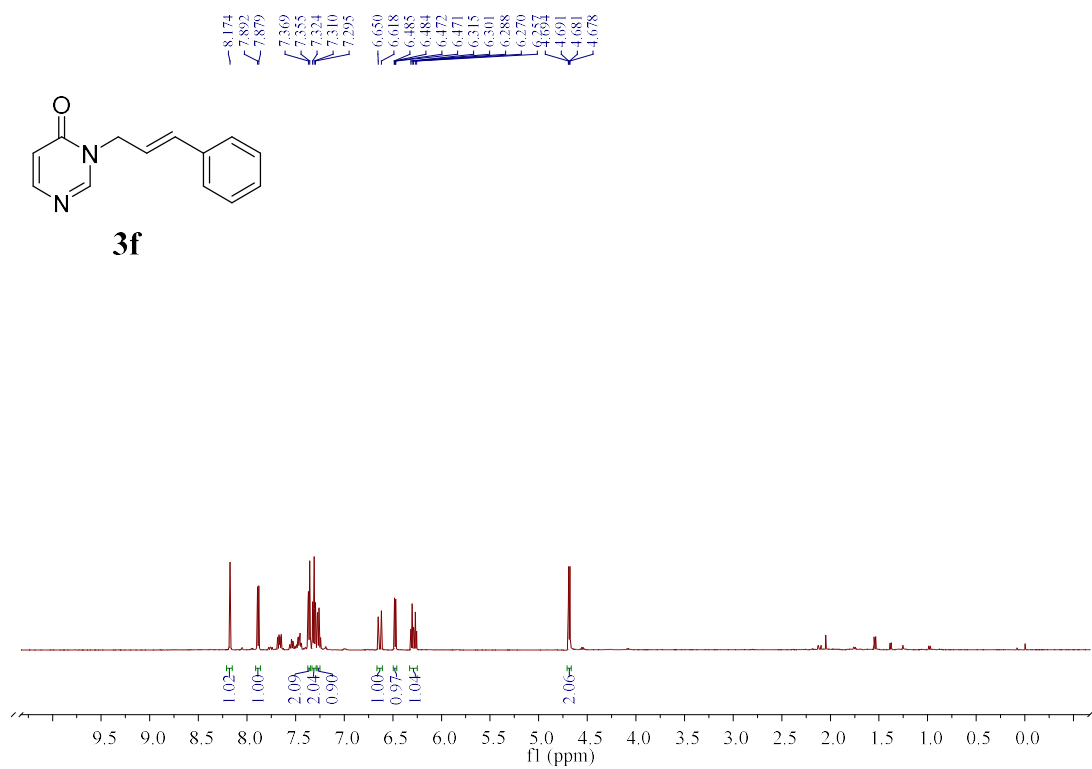

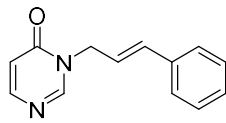

**3f**

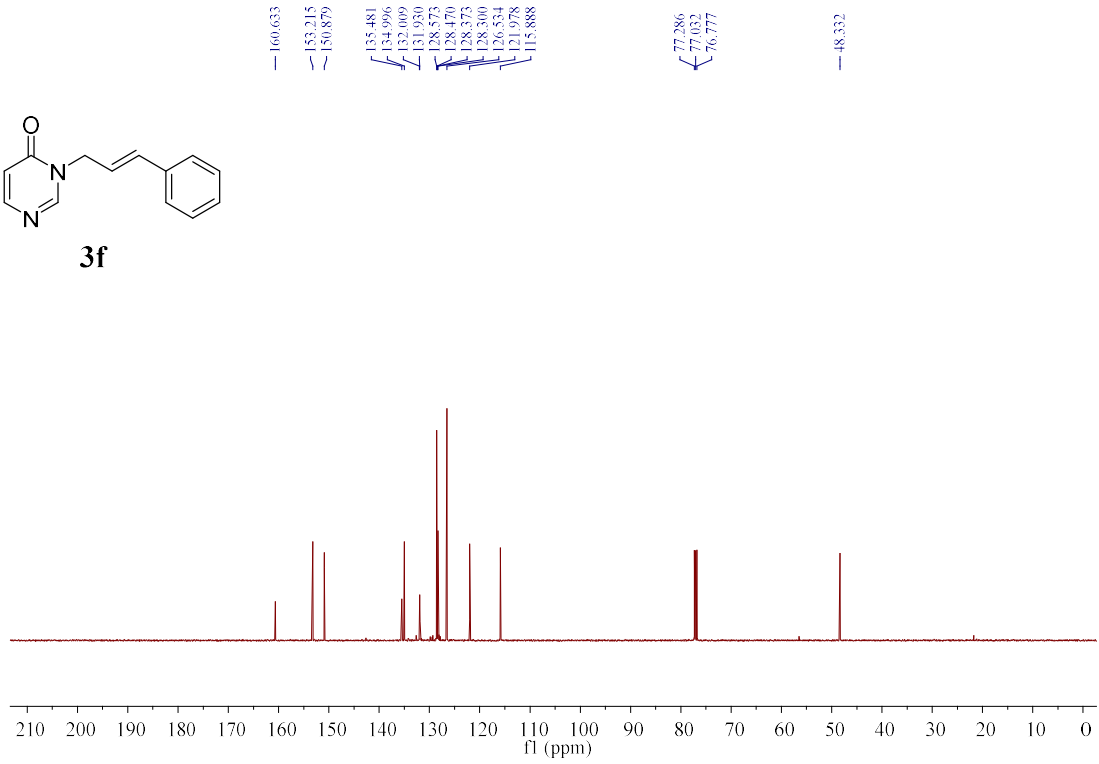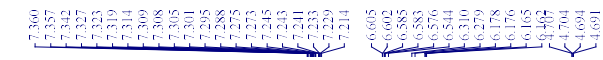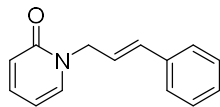

**3g**

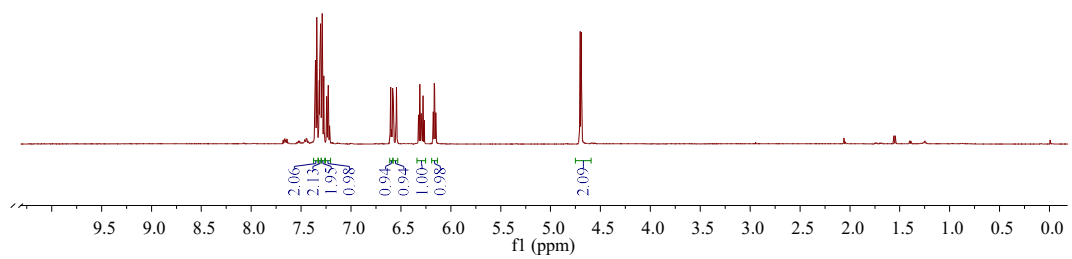

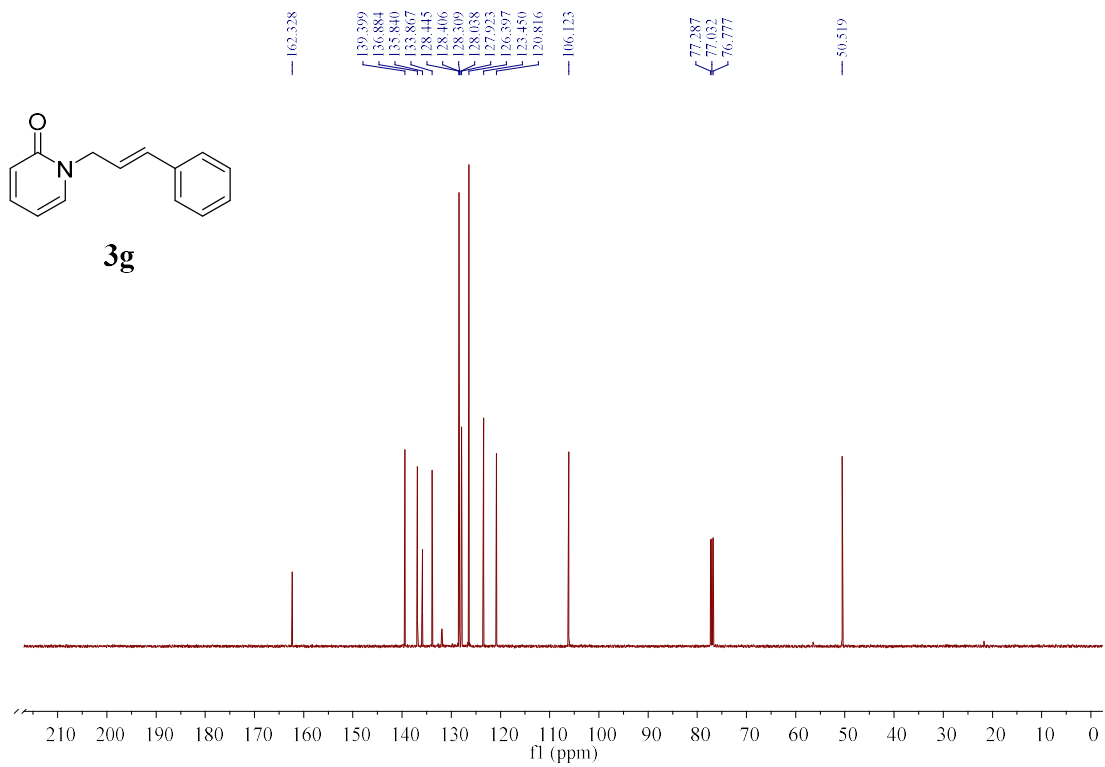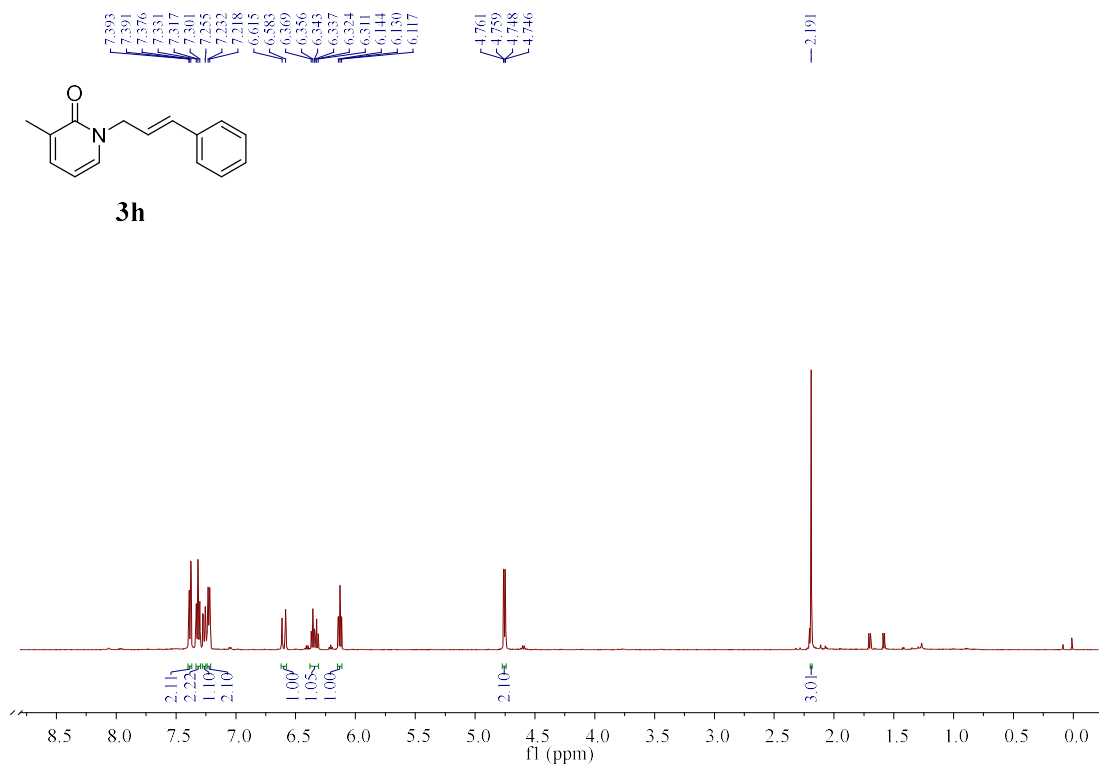

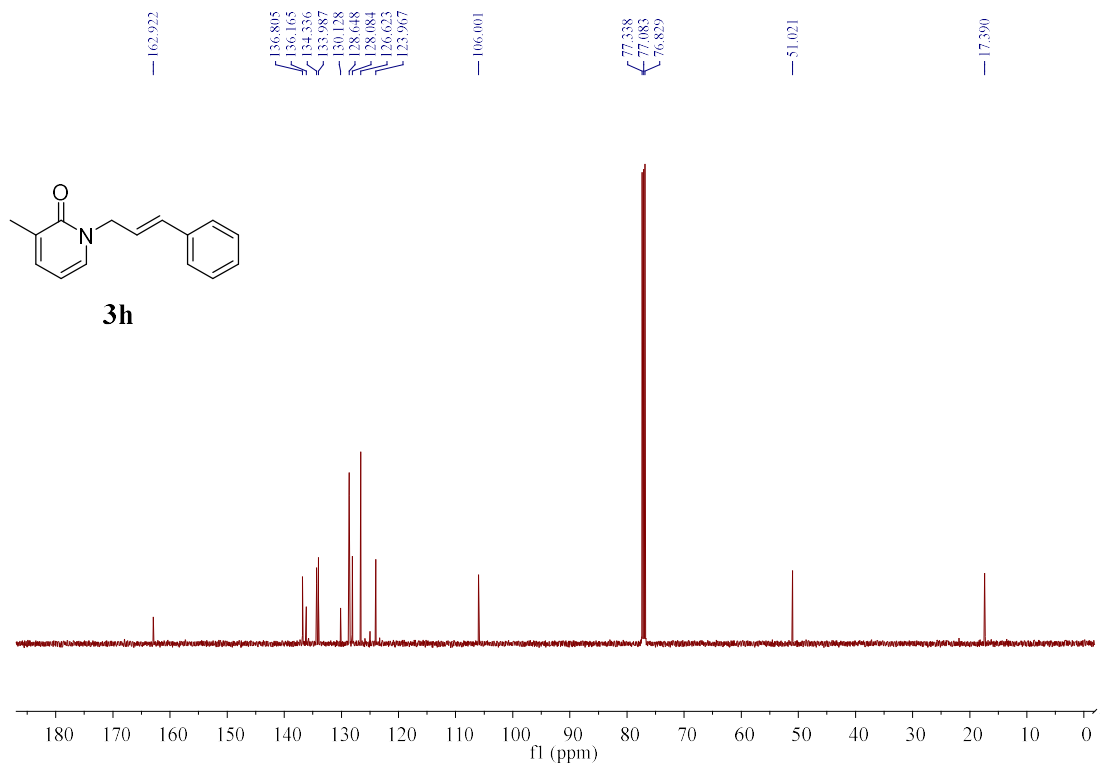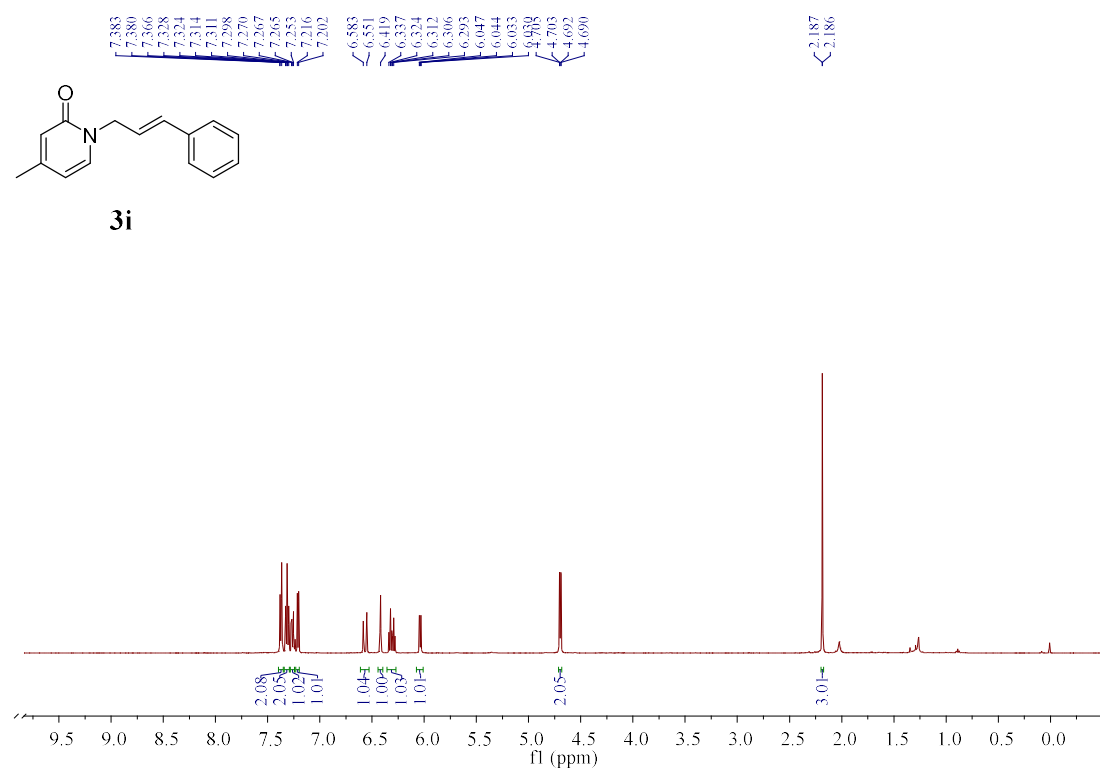

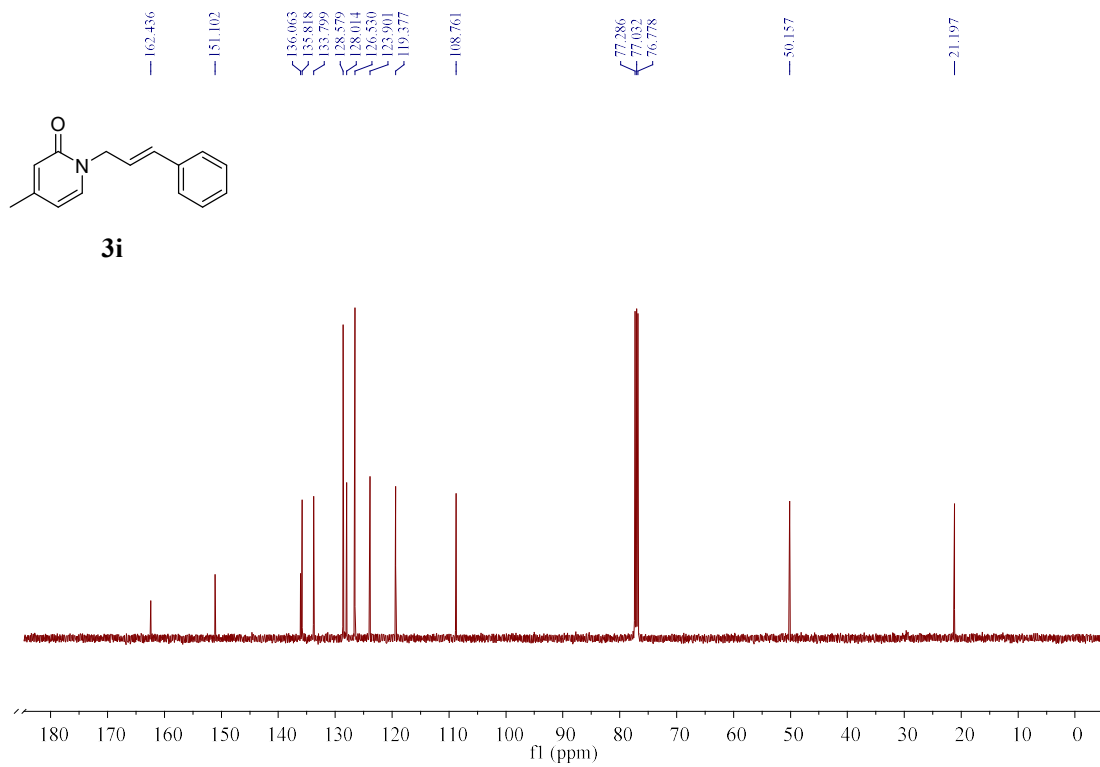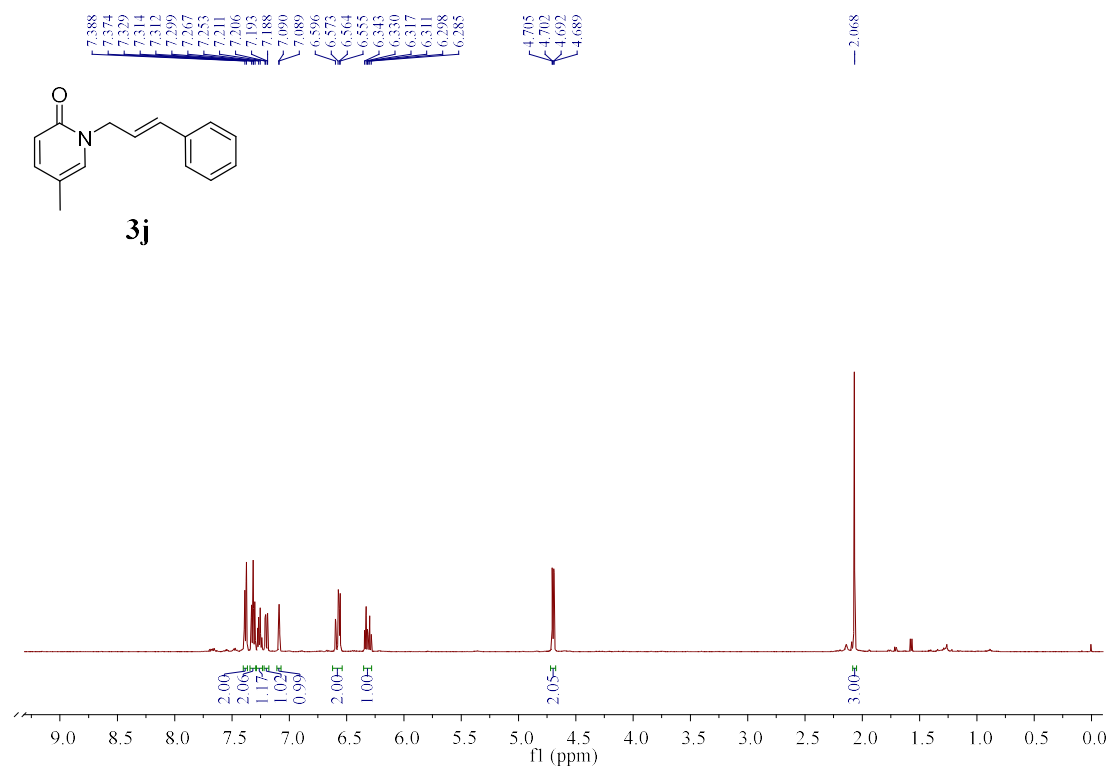

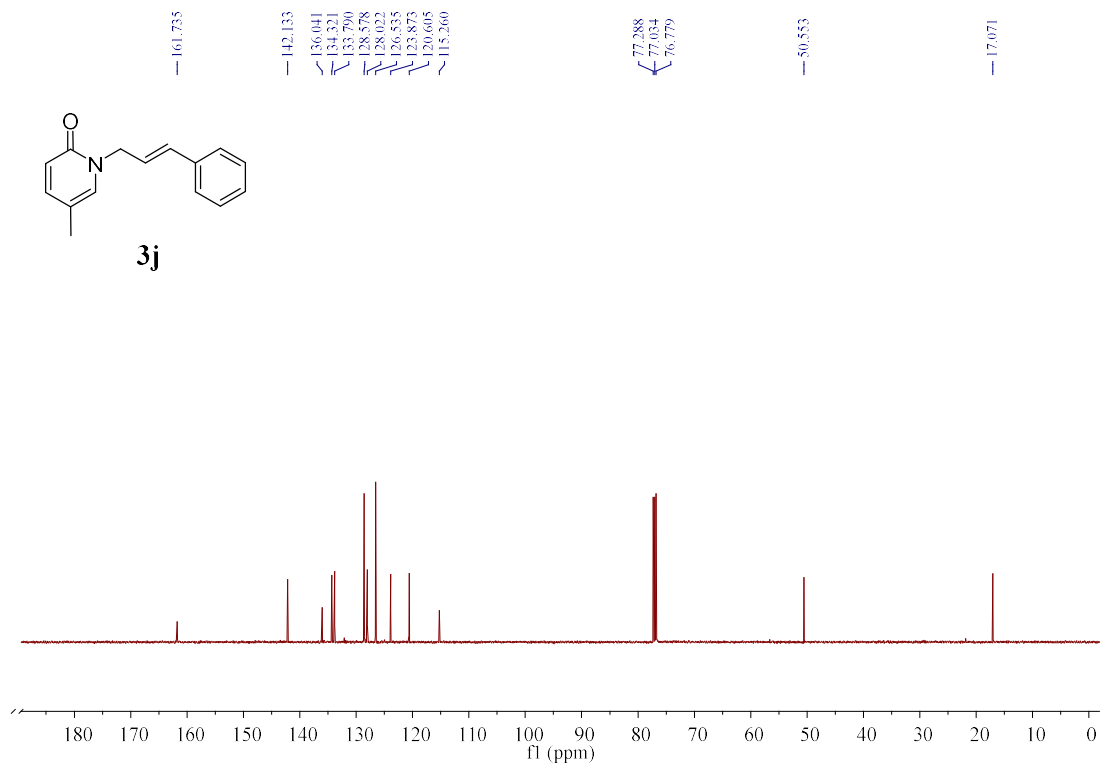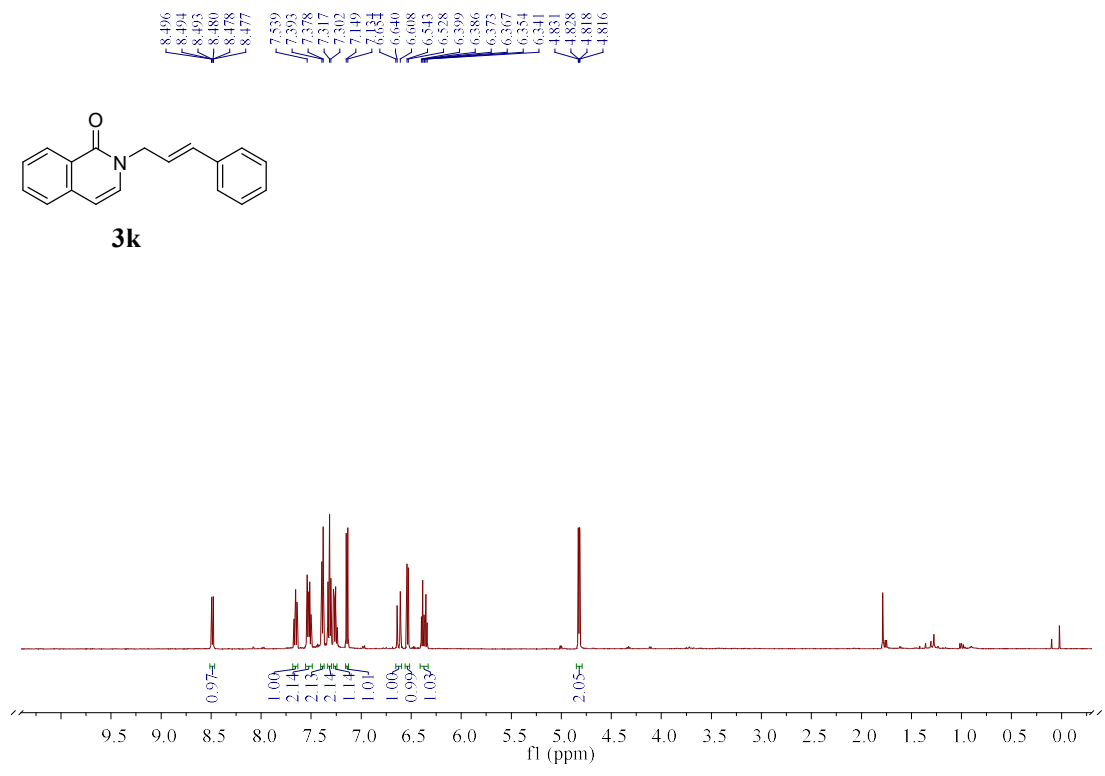

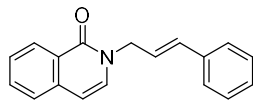

**3k**

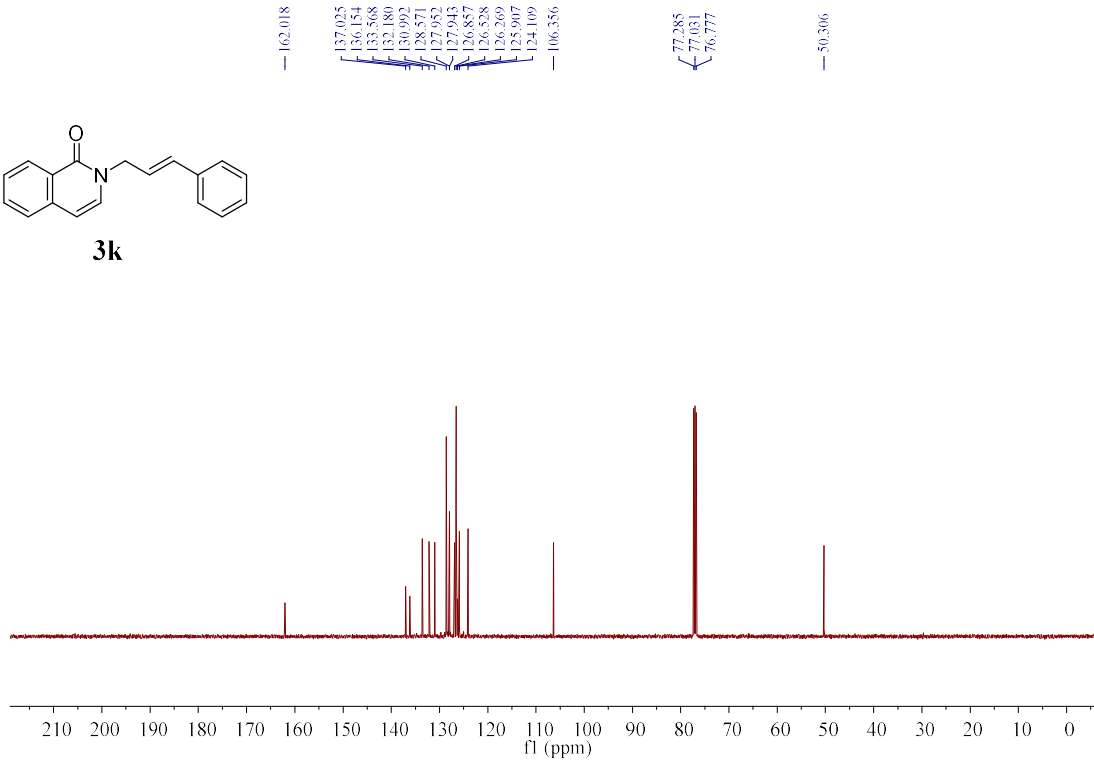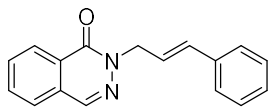

**3l**

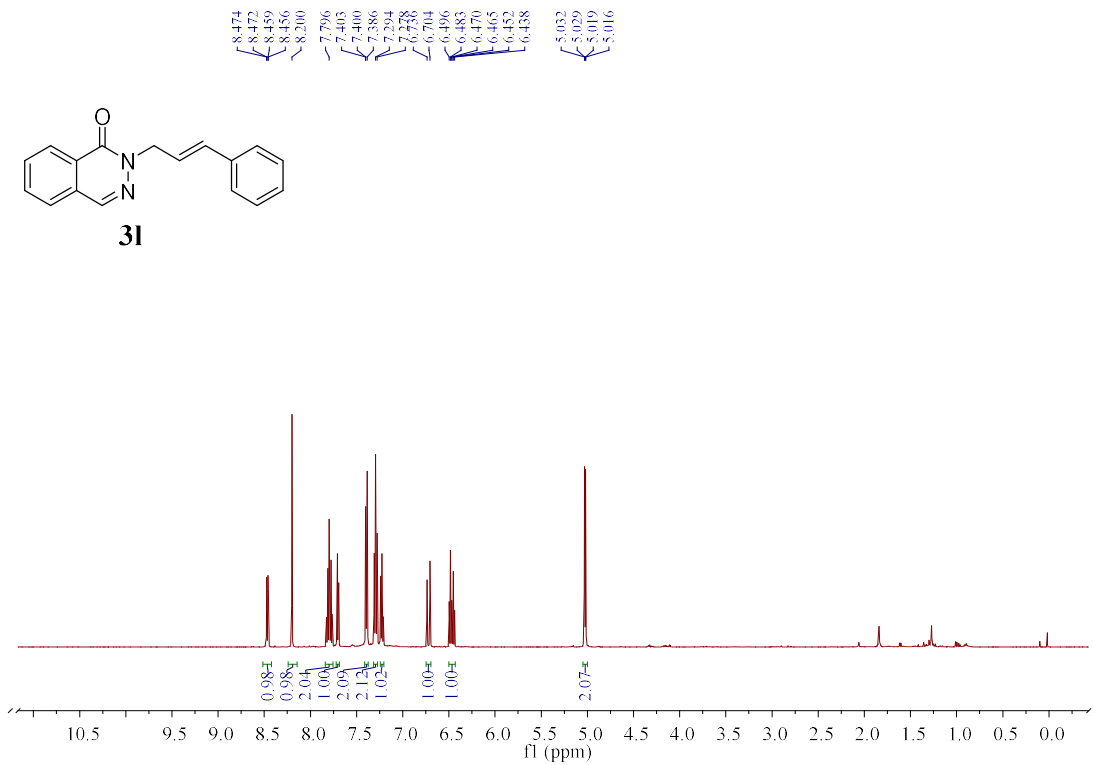



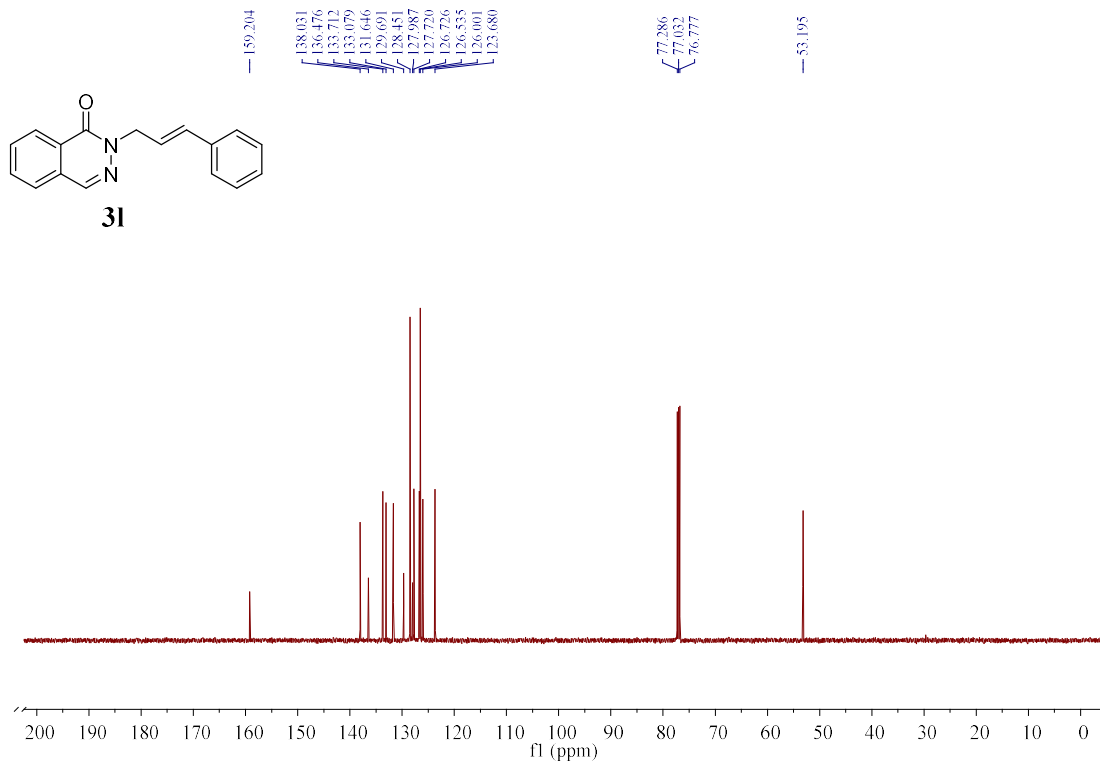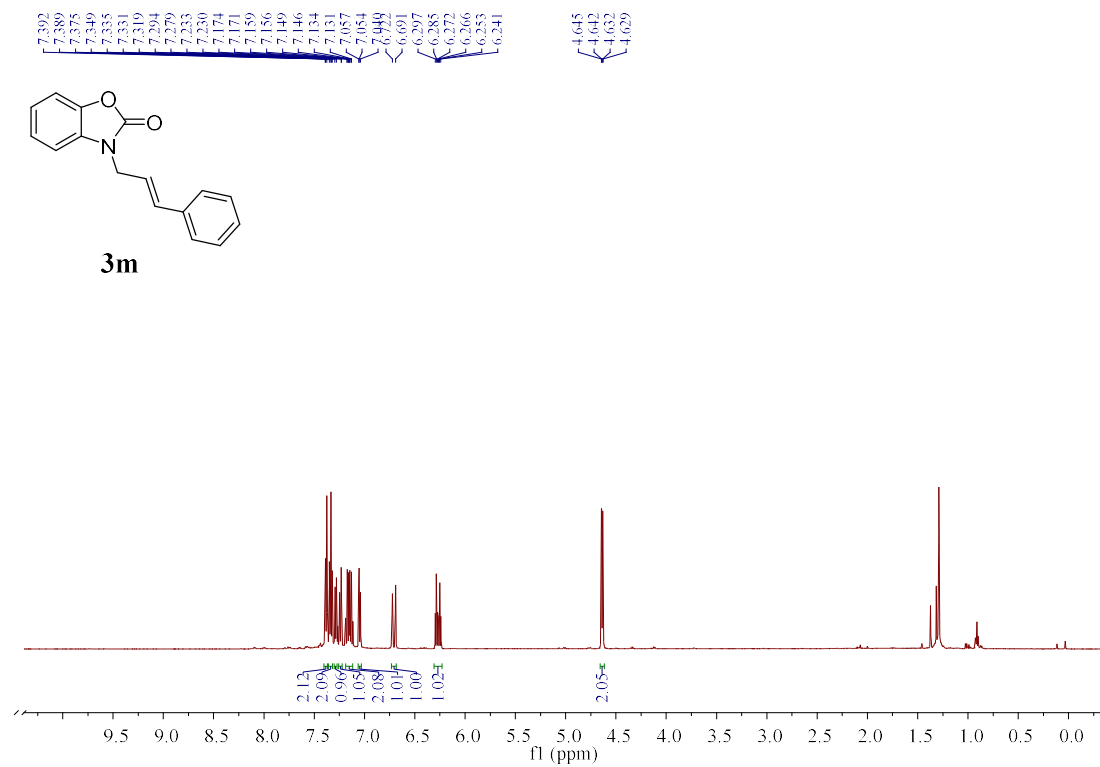

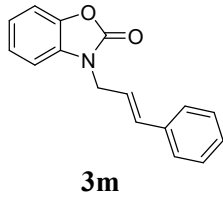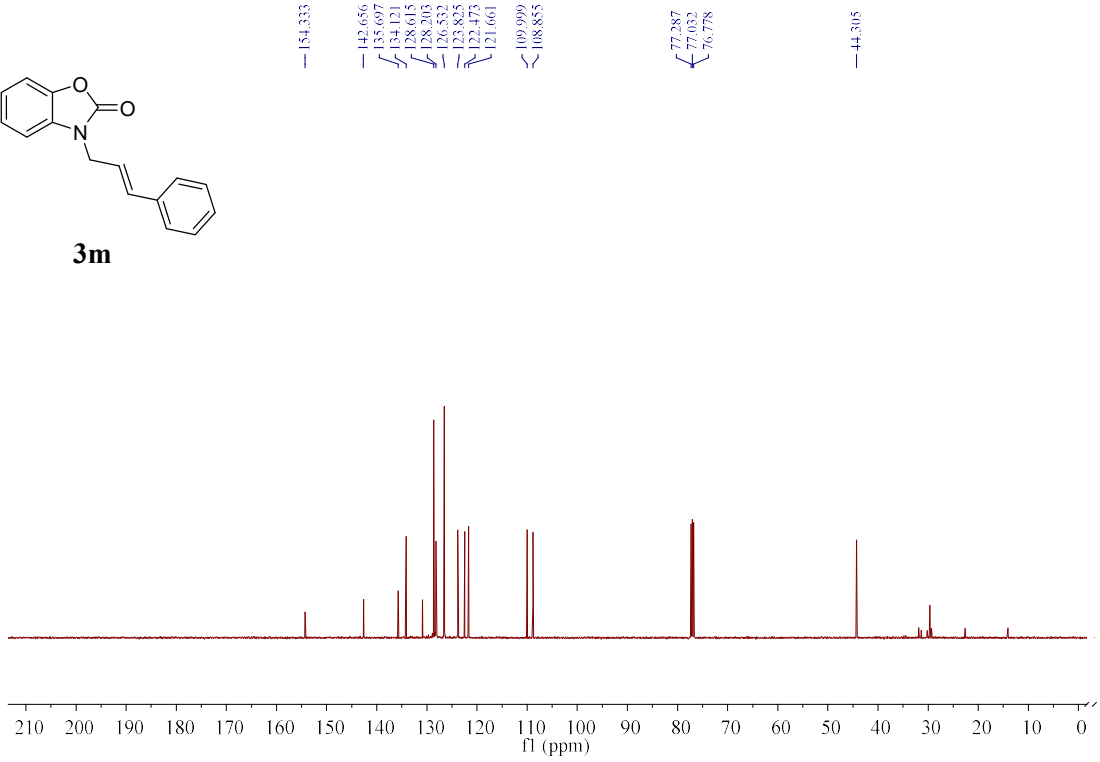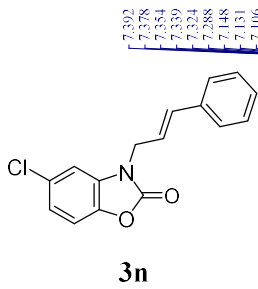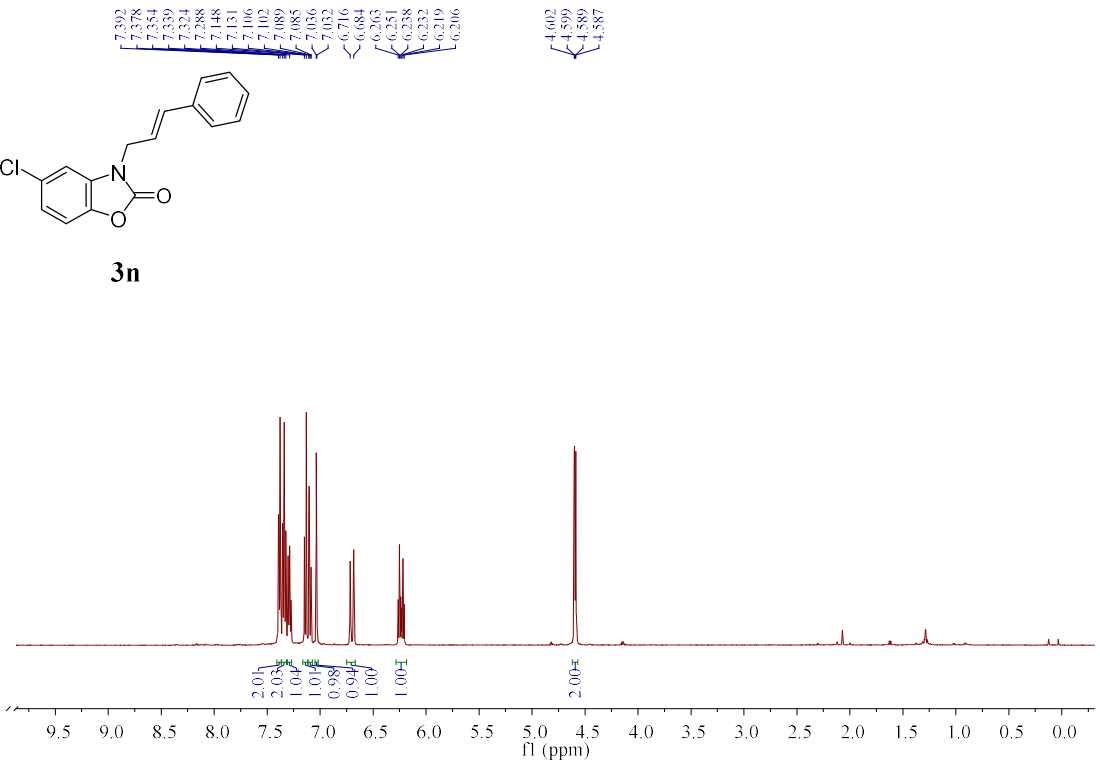

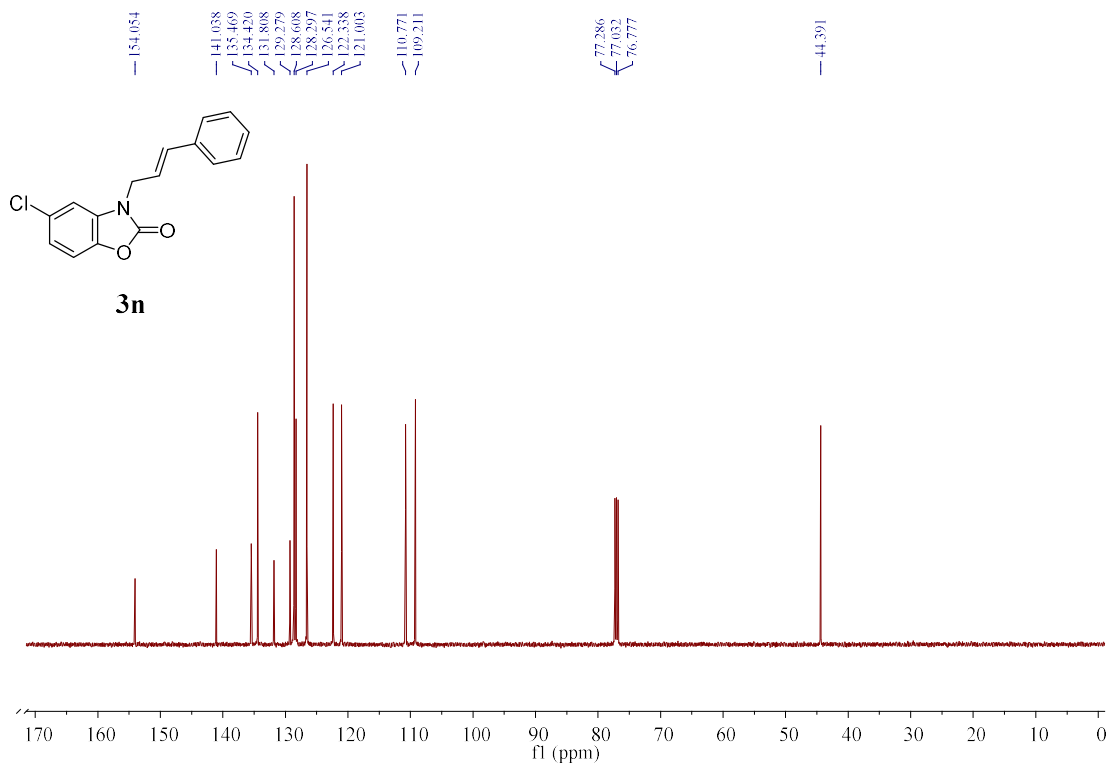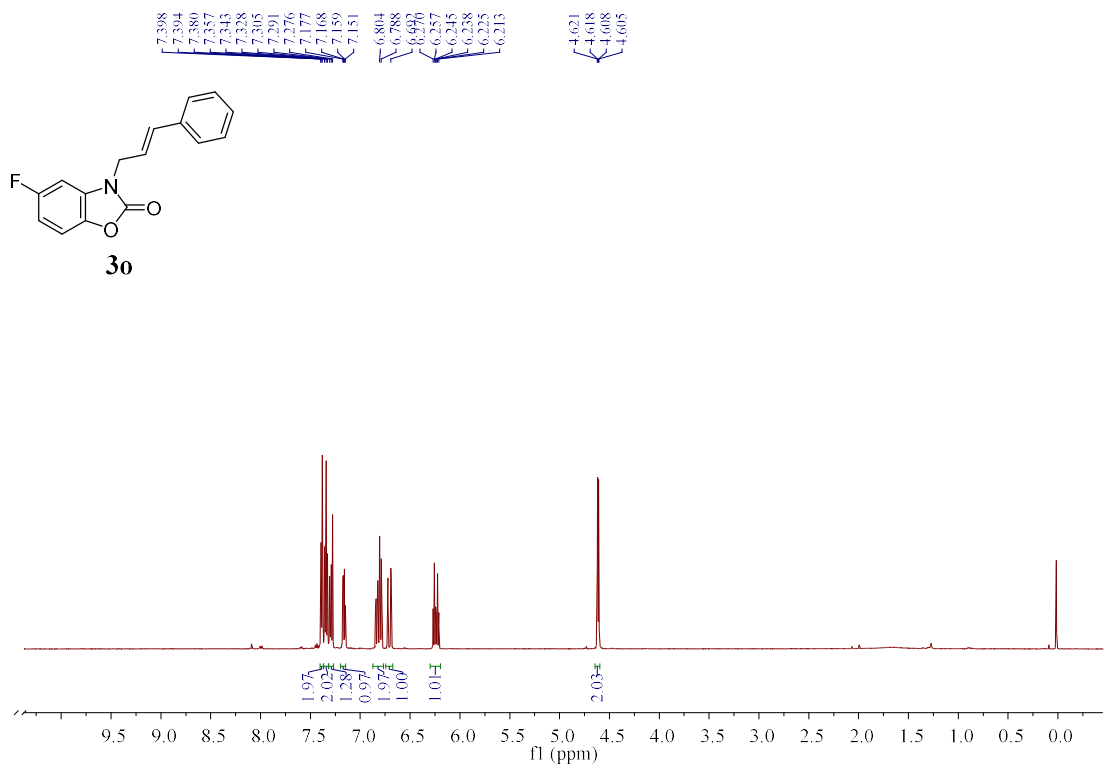

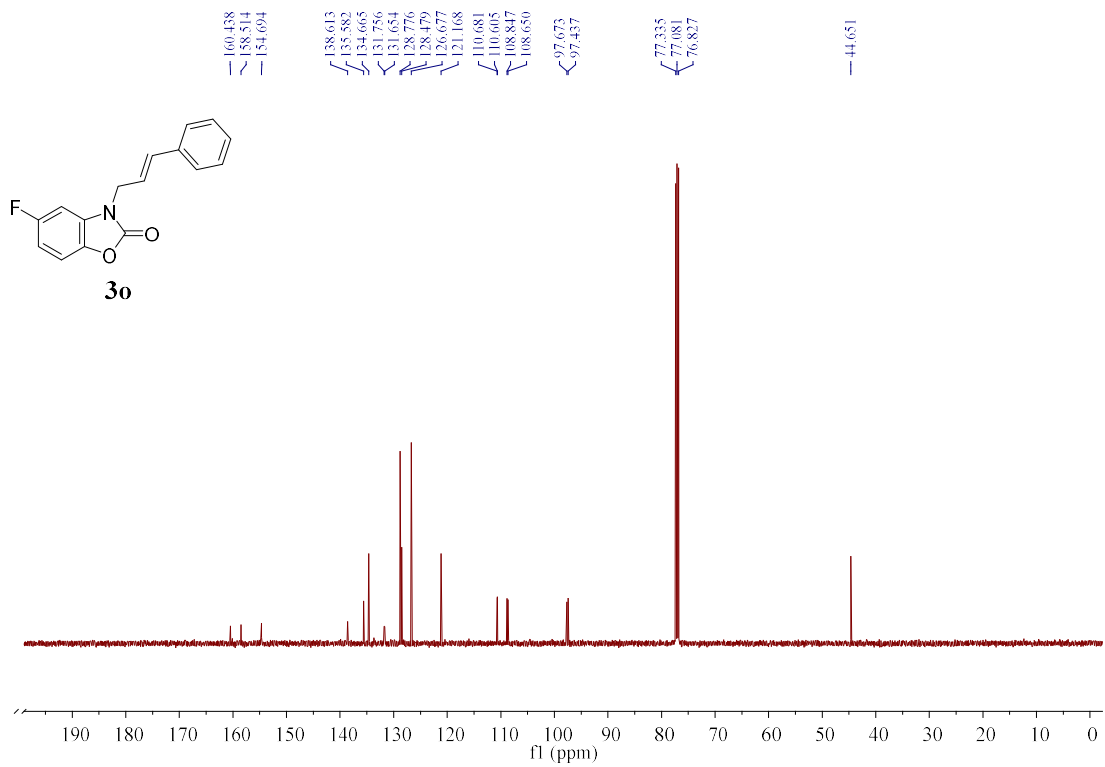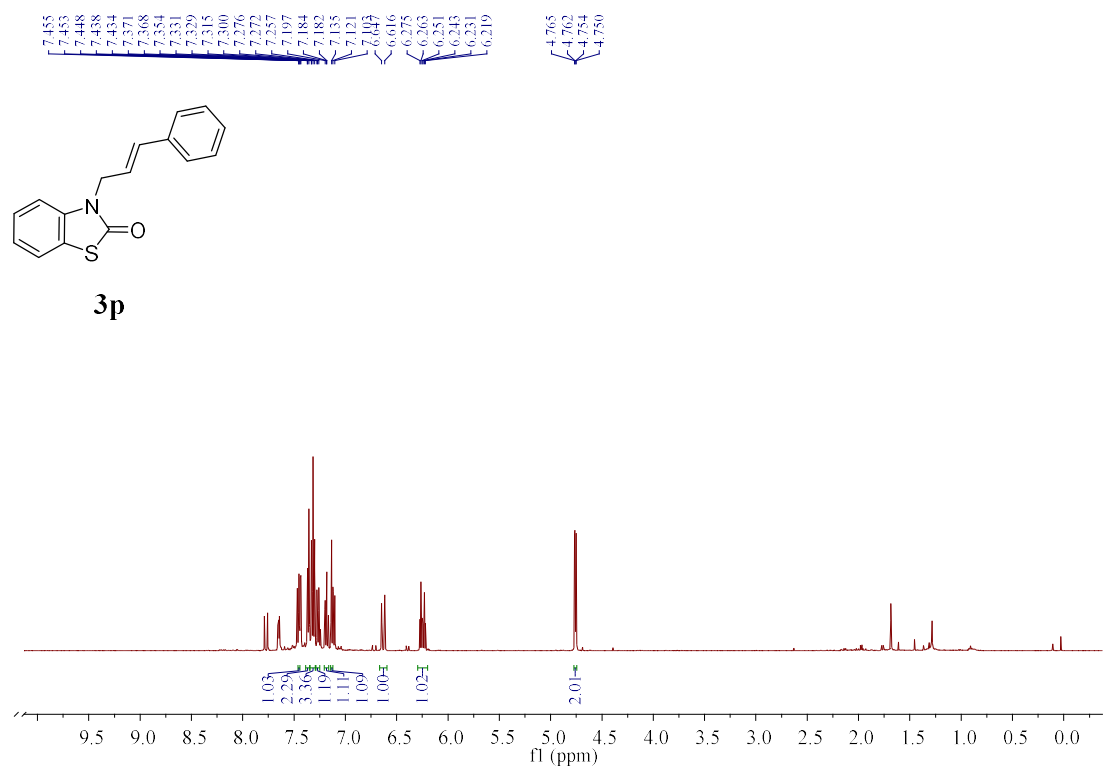

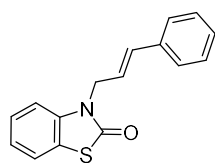

**3p**

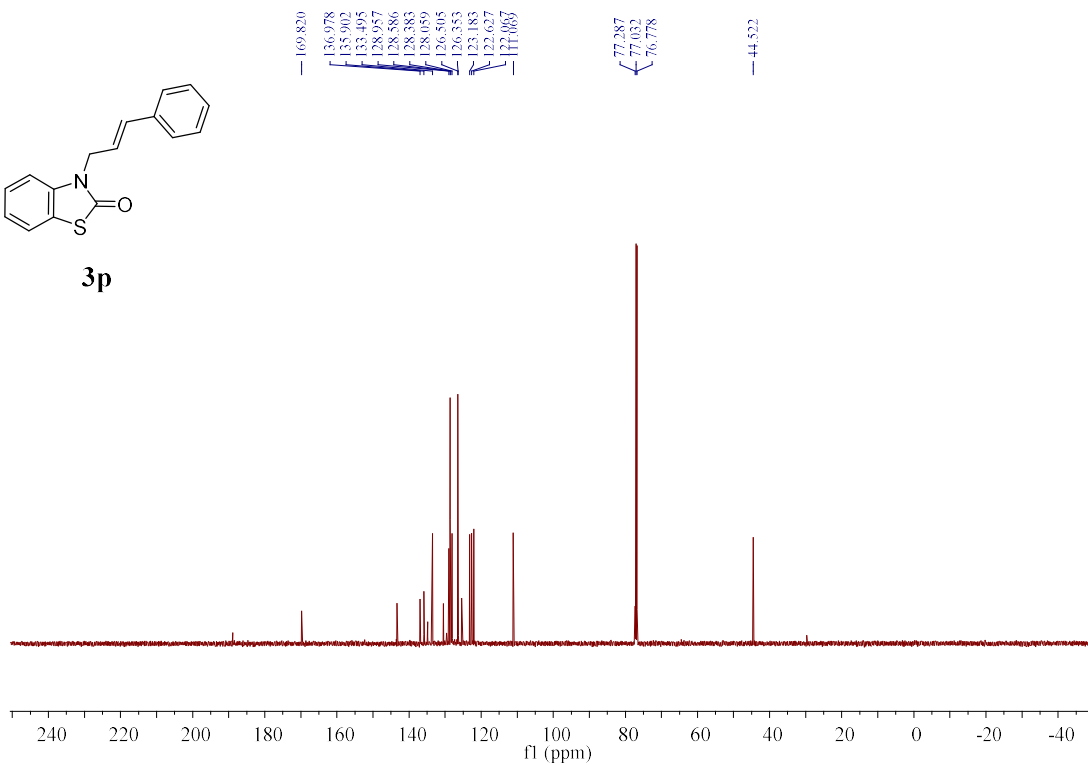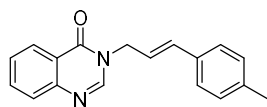

**3q**

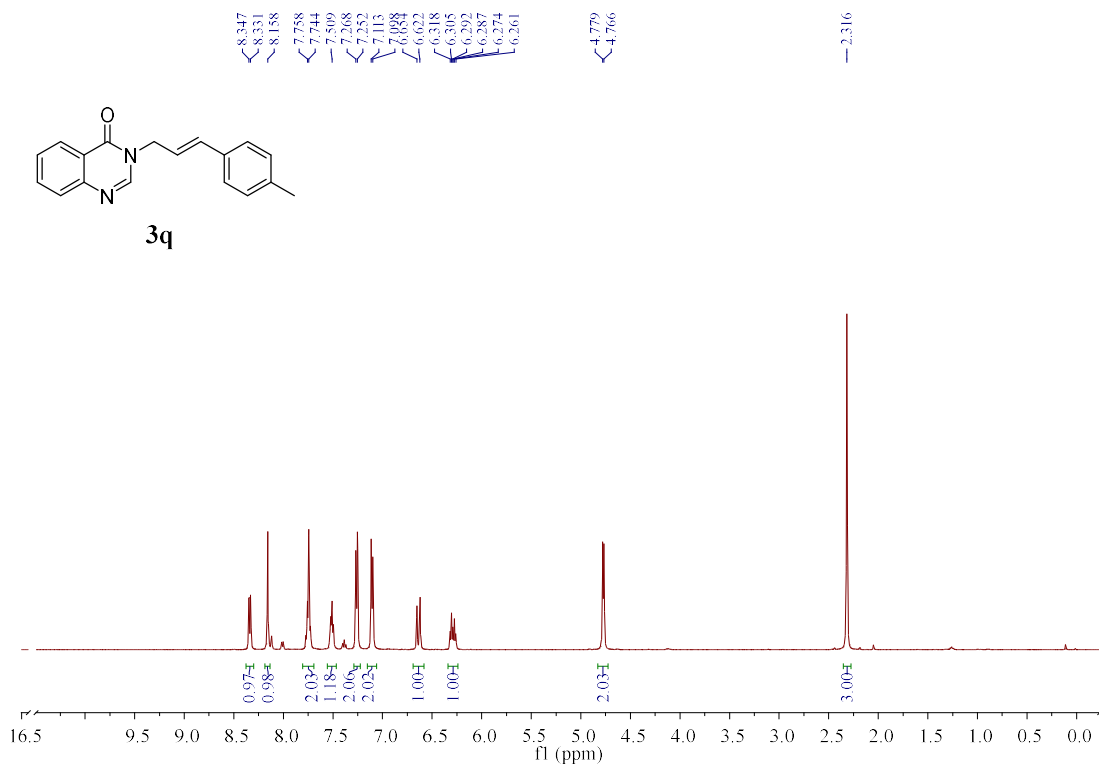

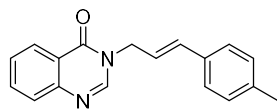

**3q**

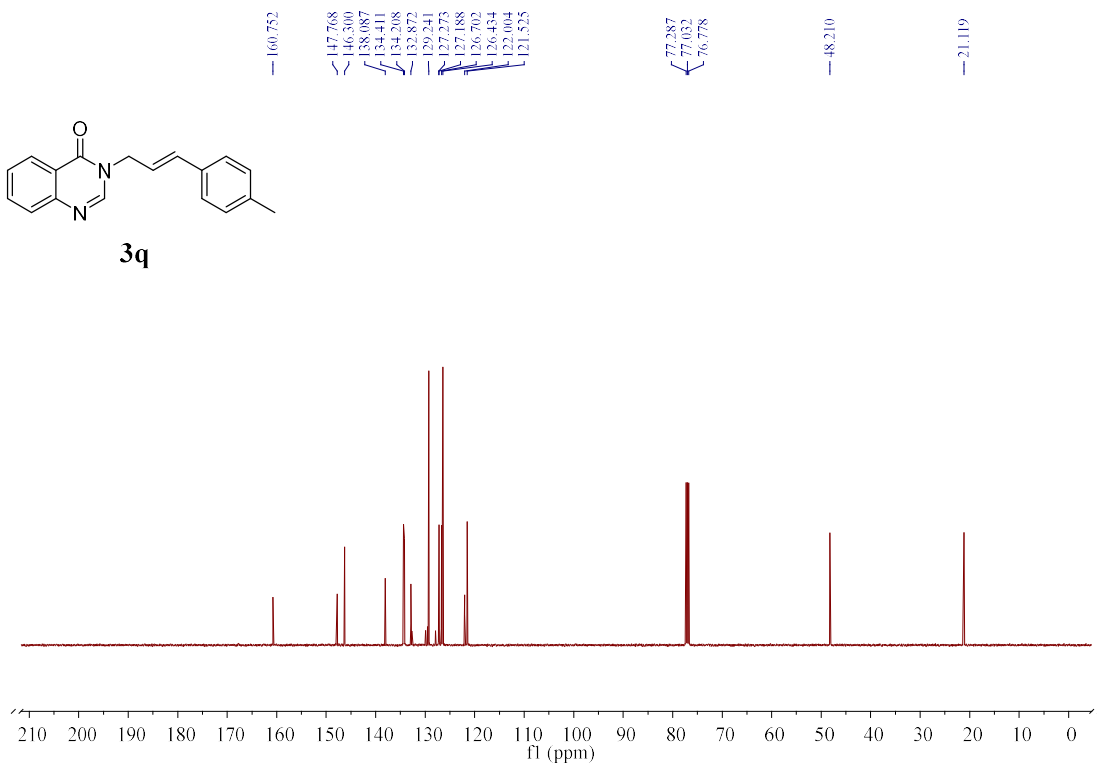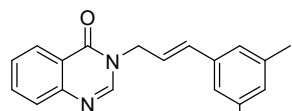

**3r**

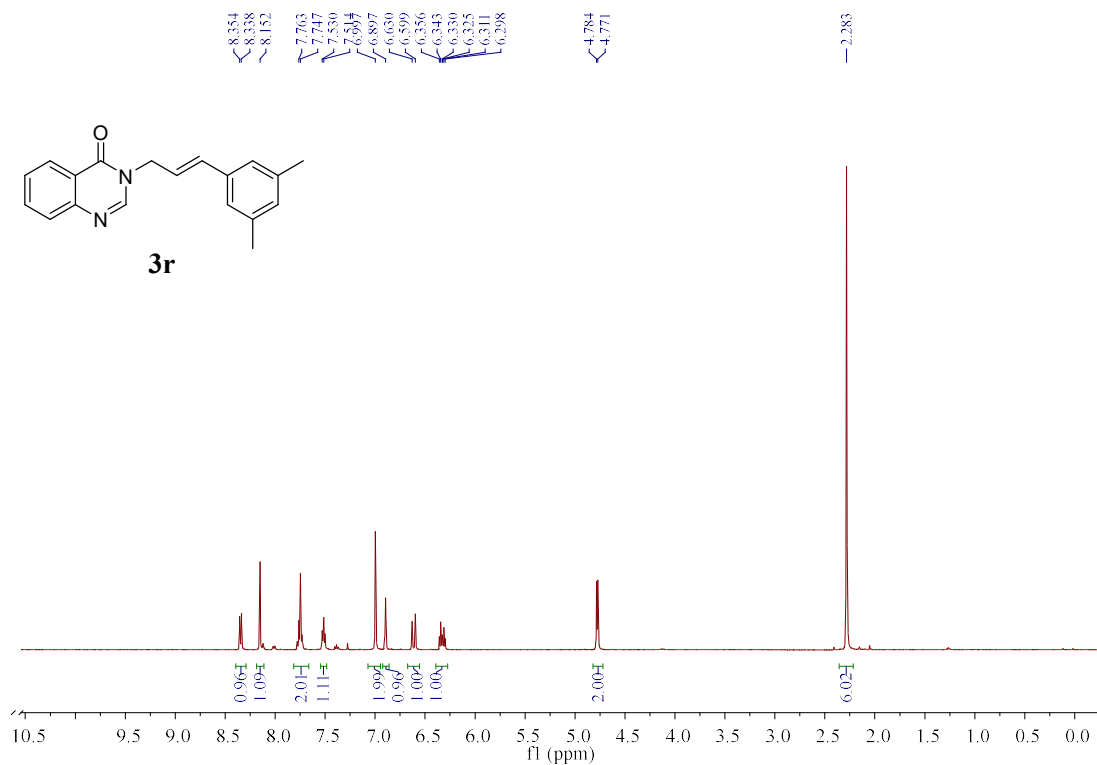

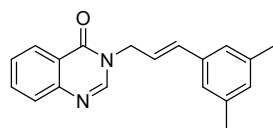

**3r**

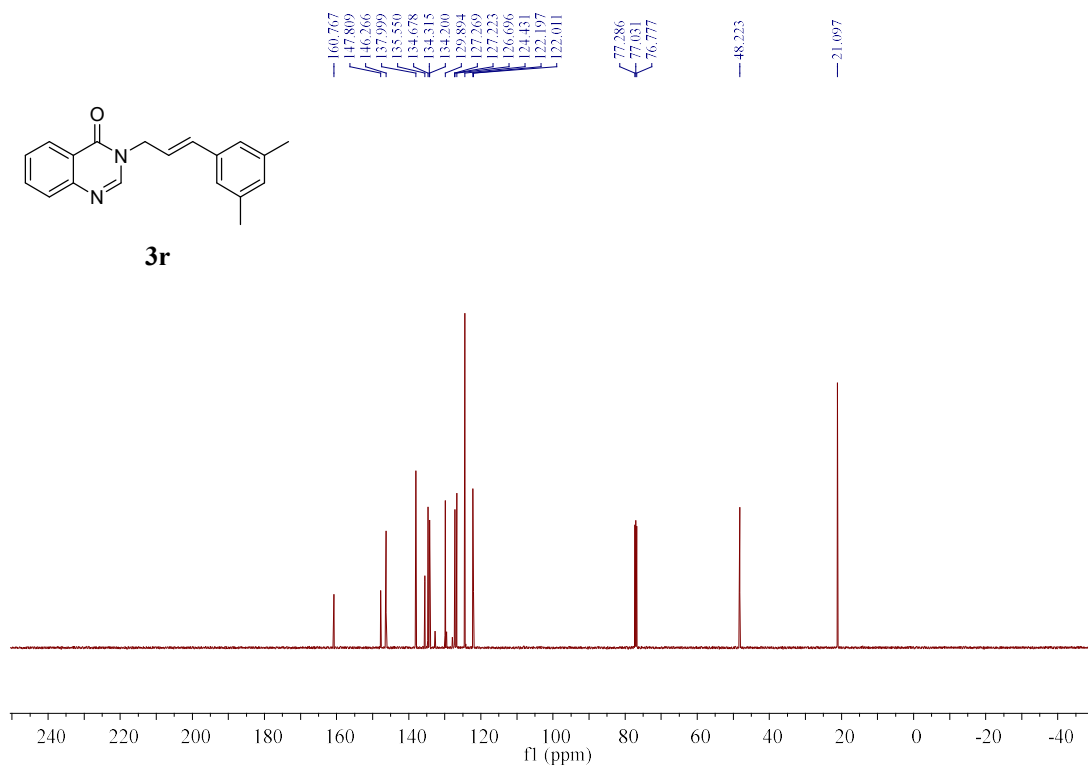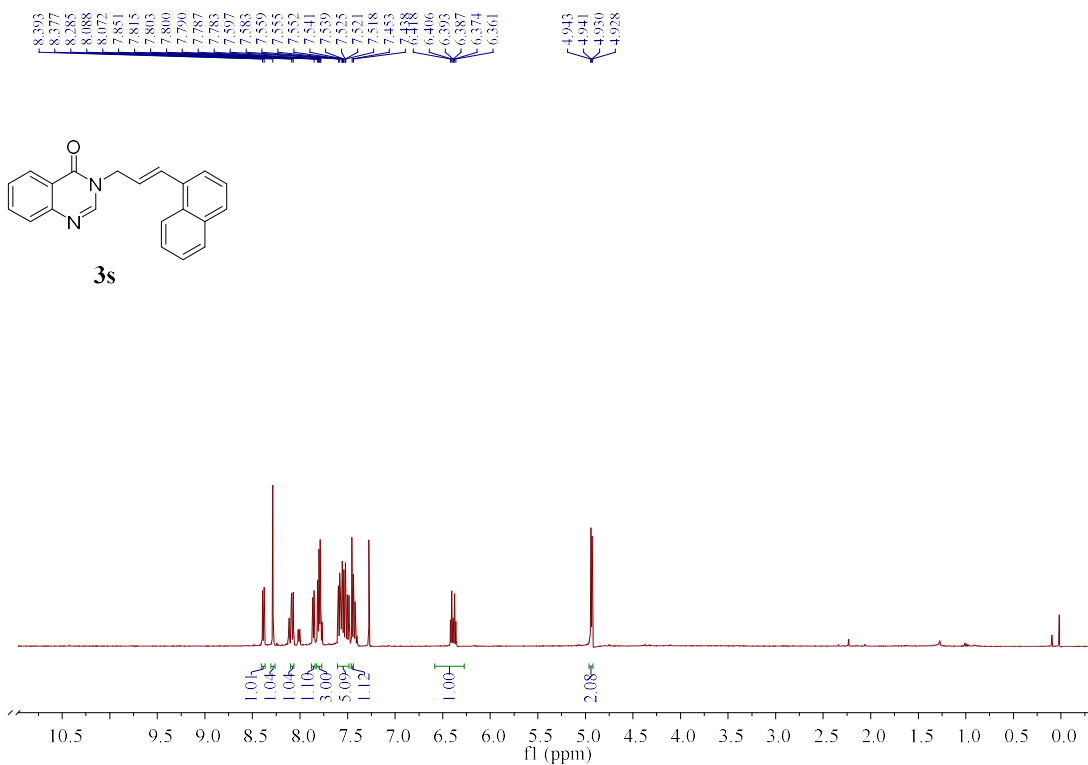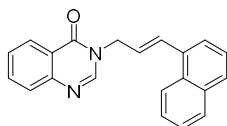

**3s**

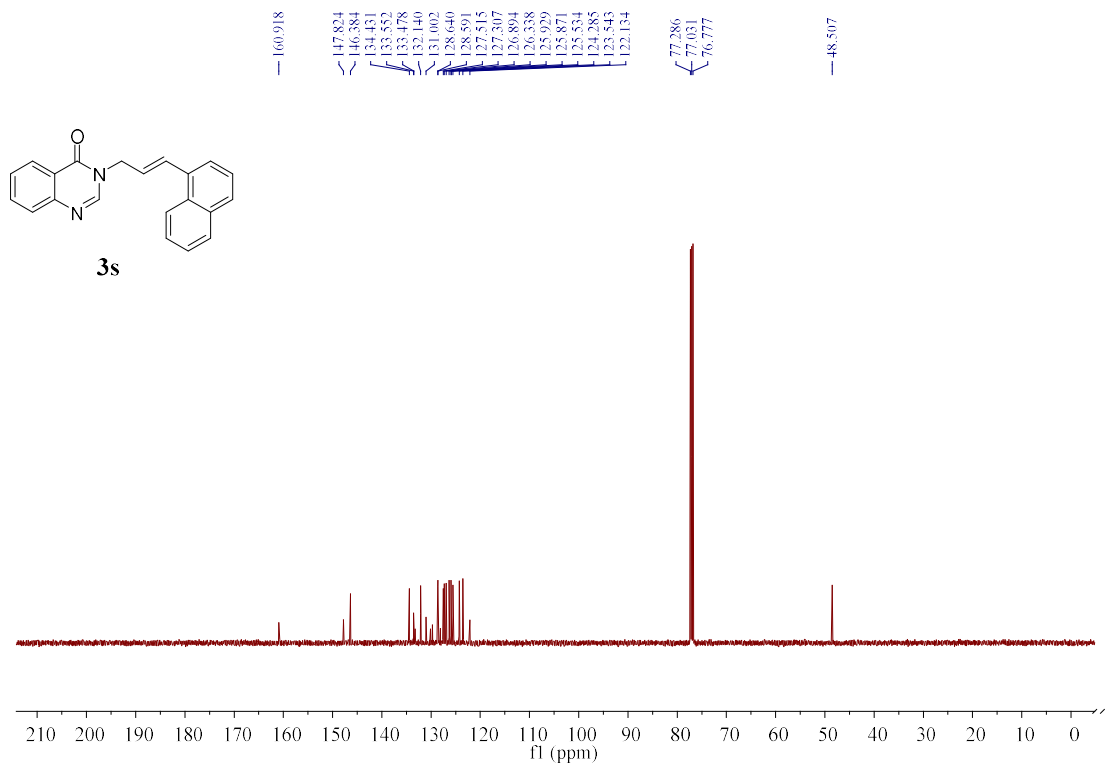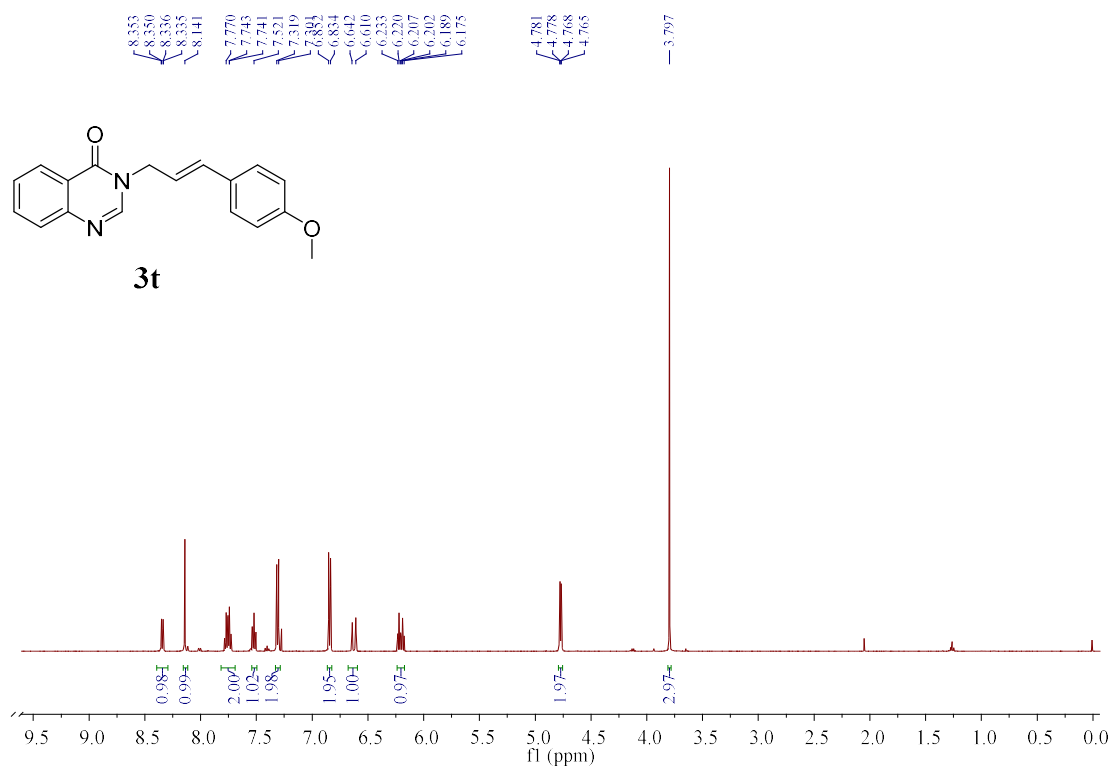



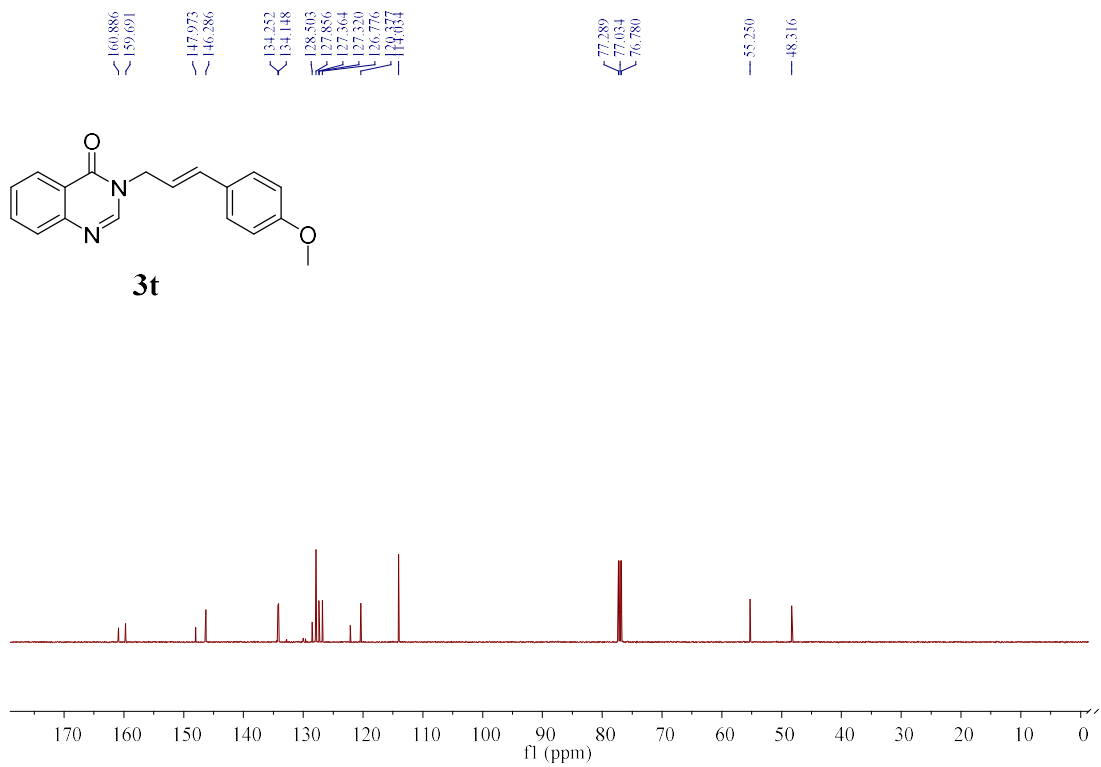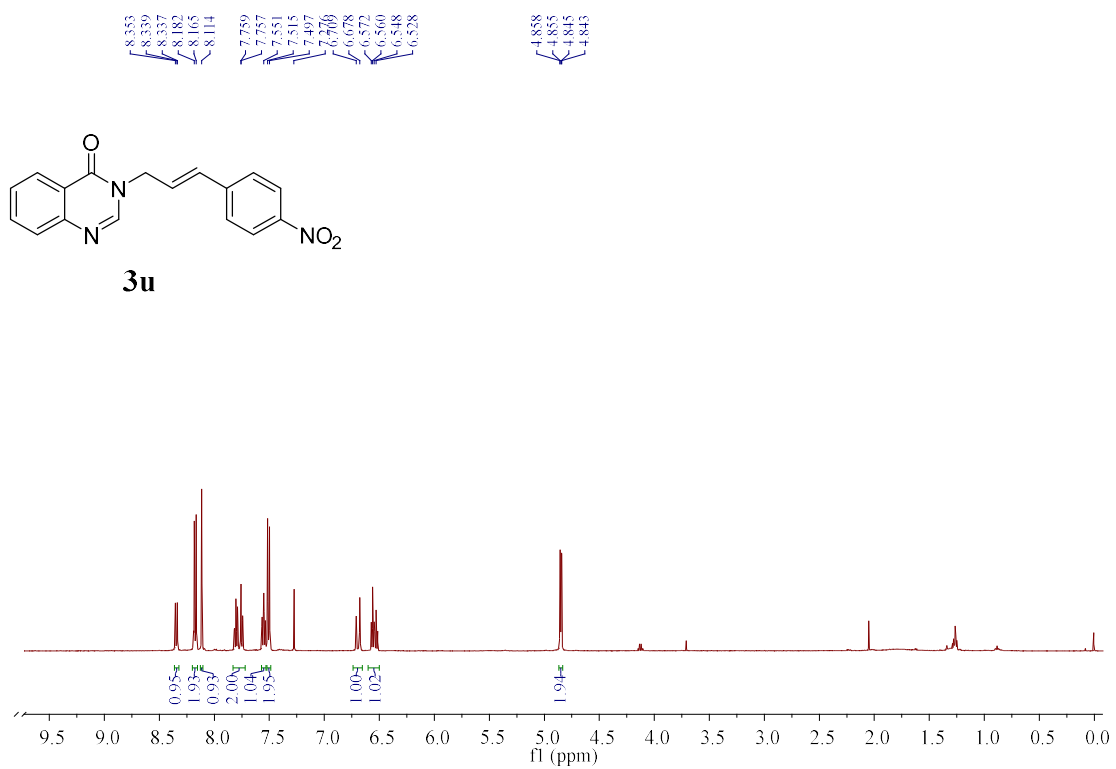

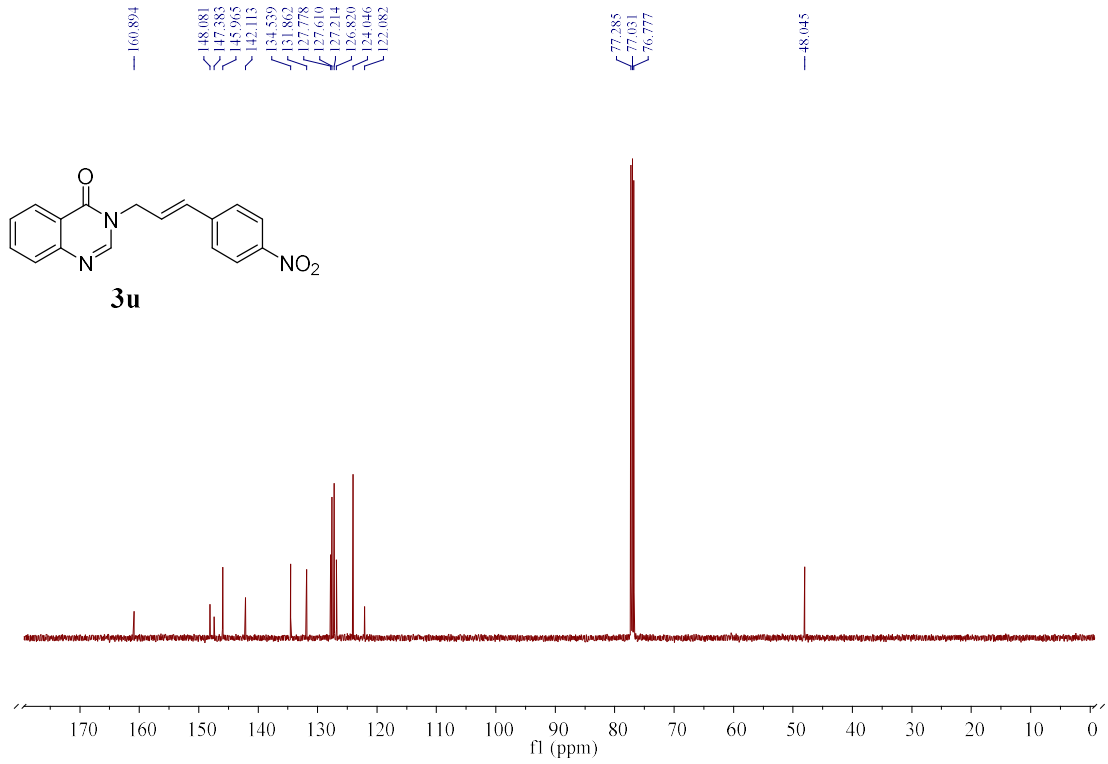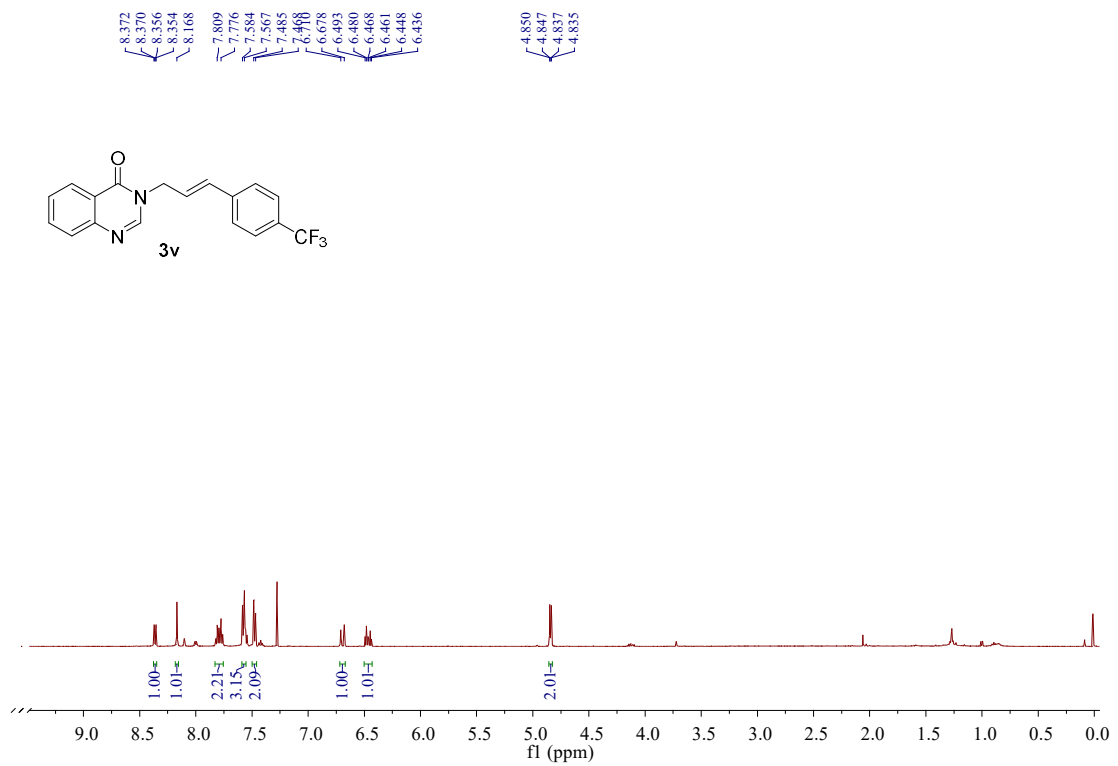

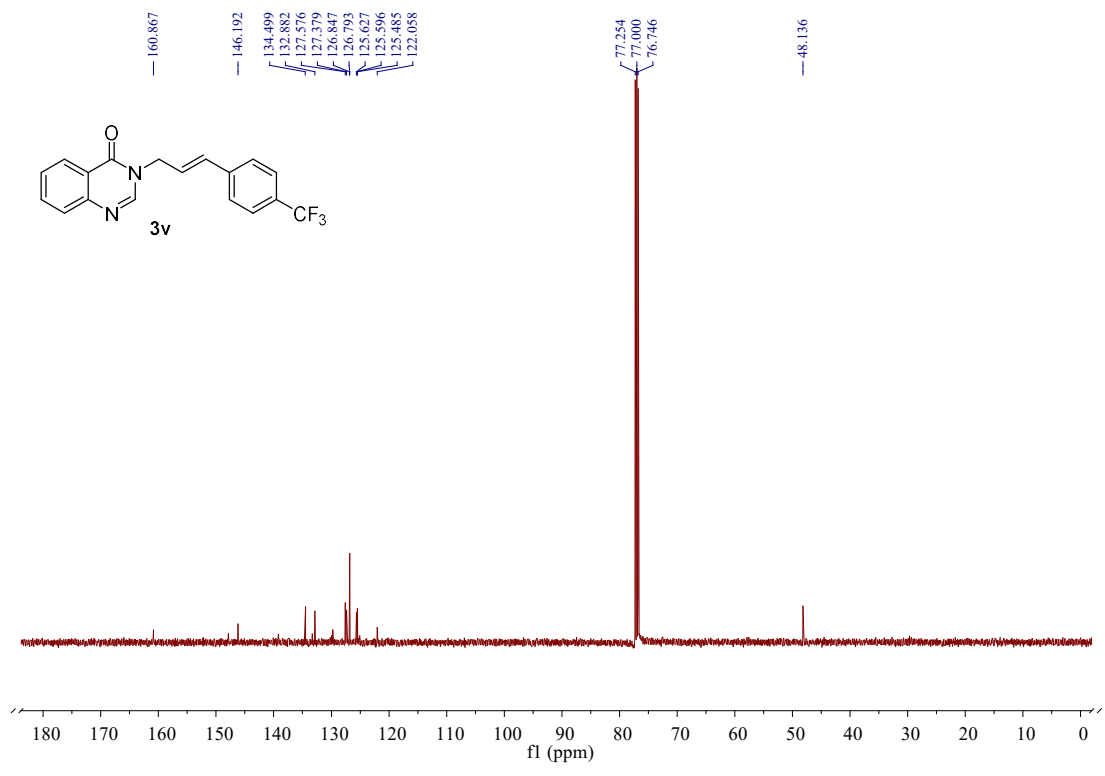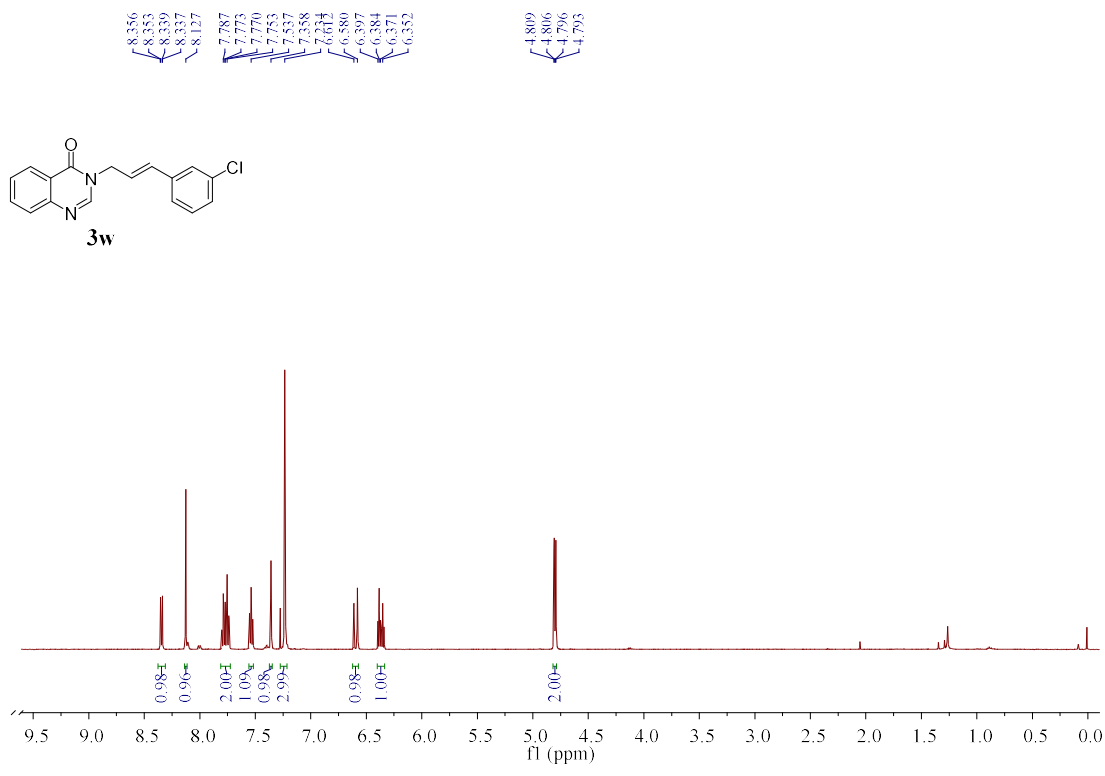

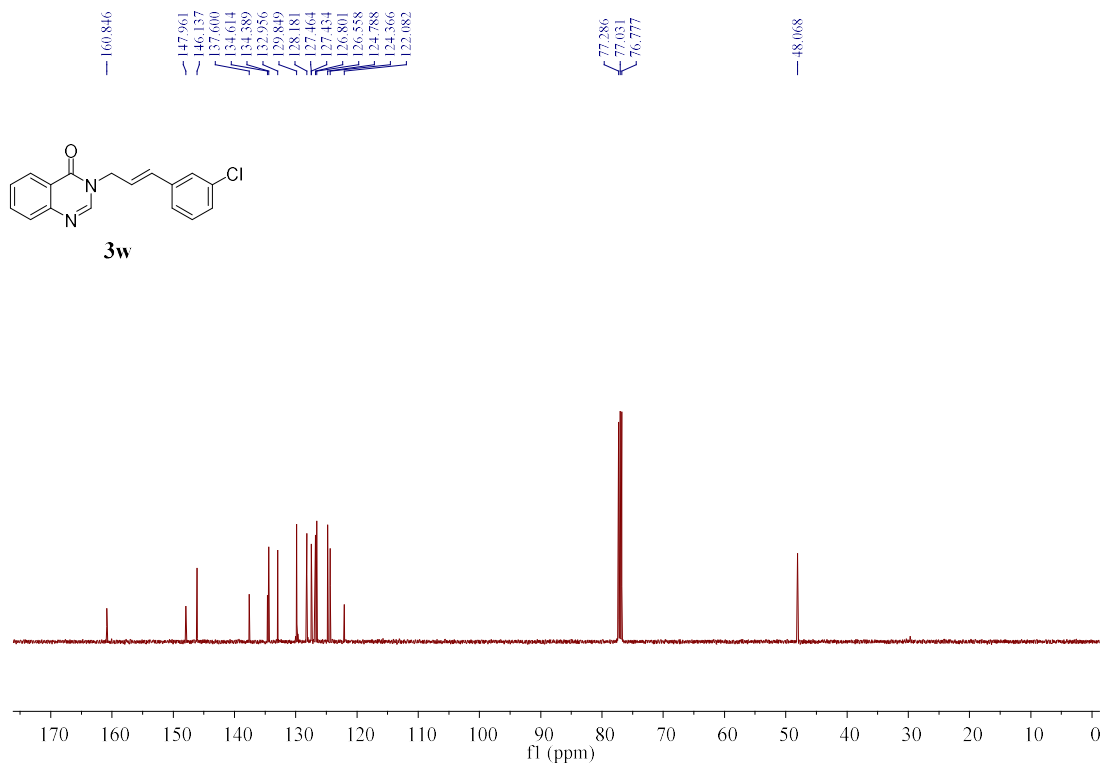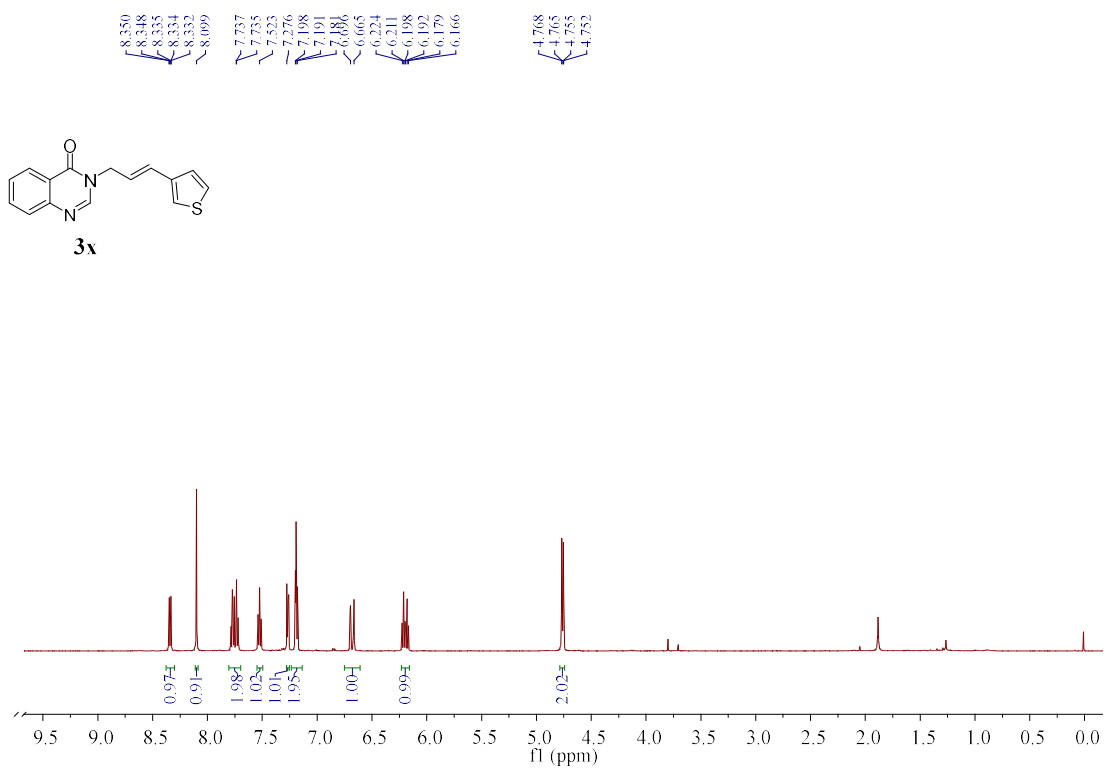

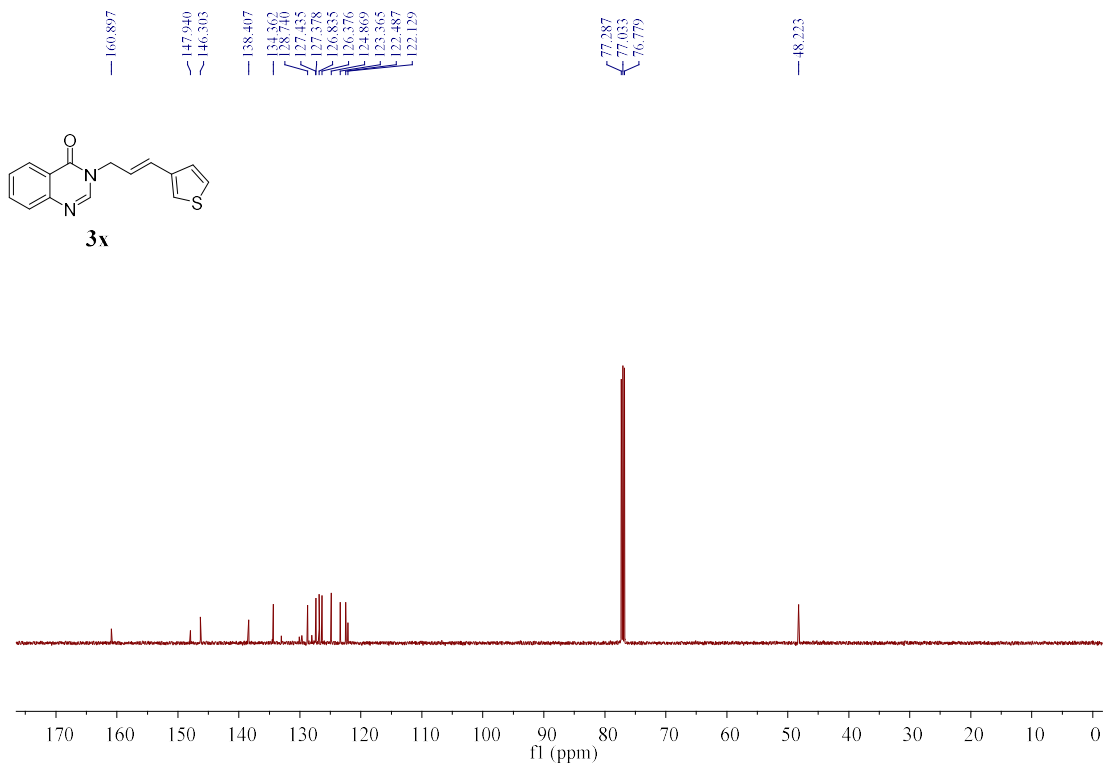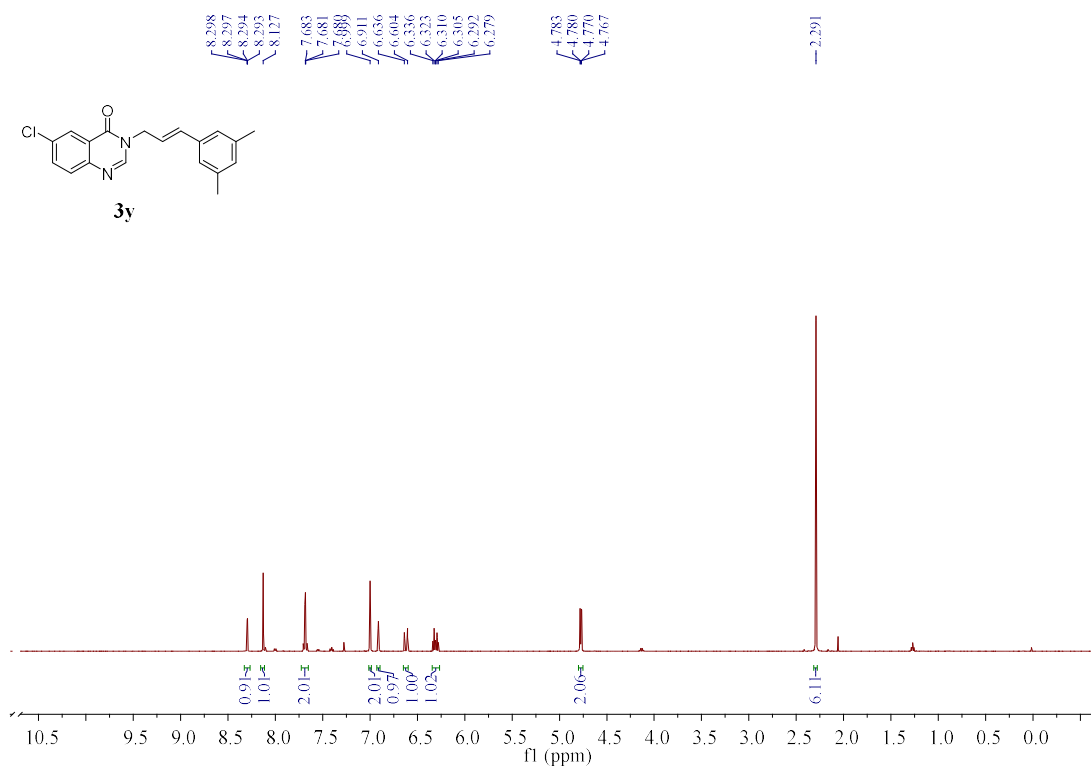

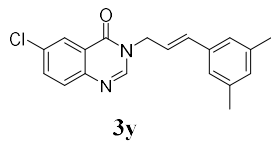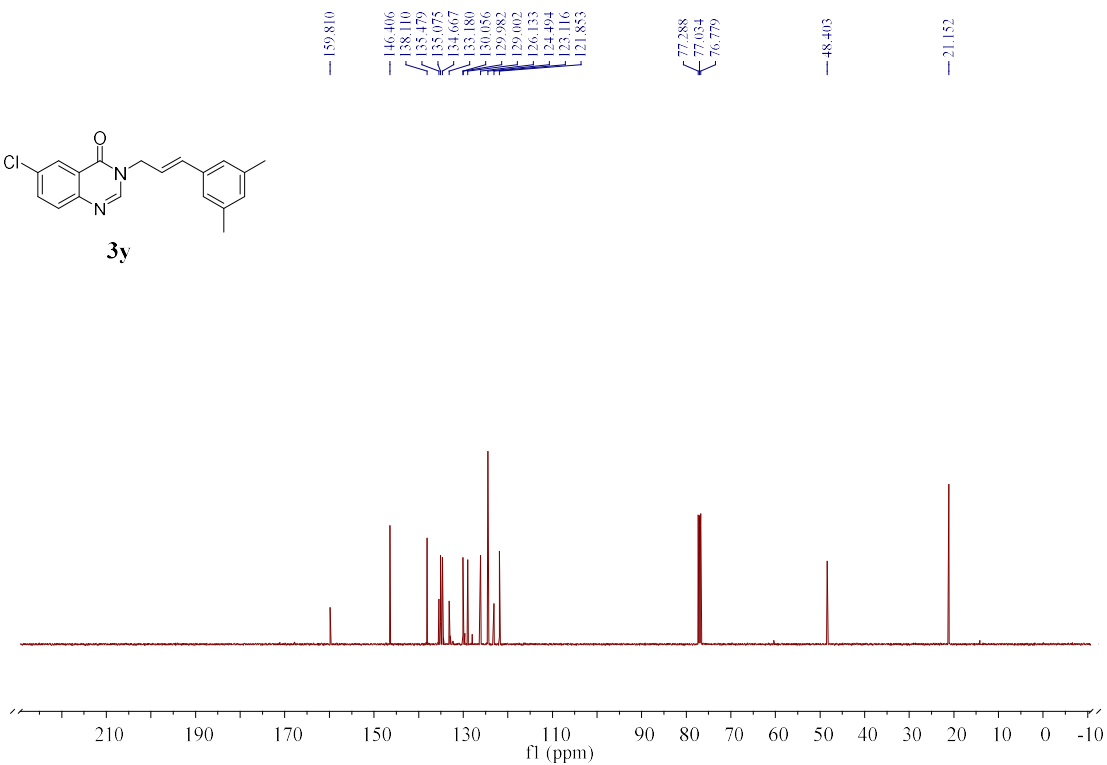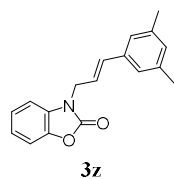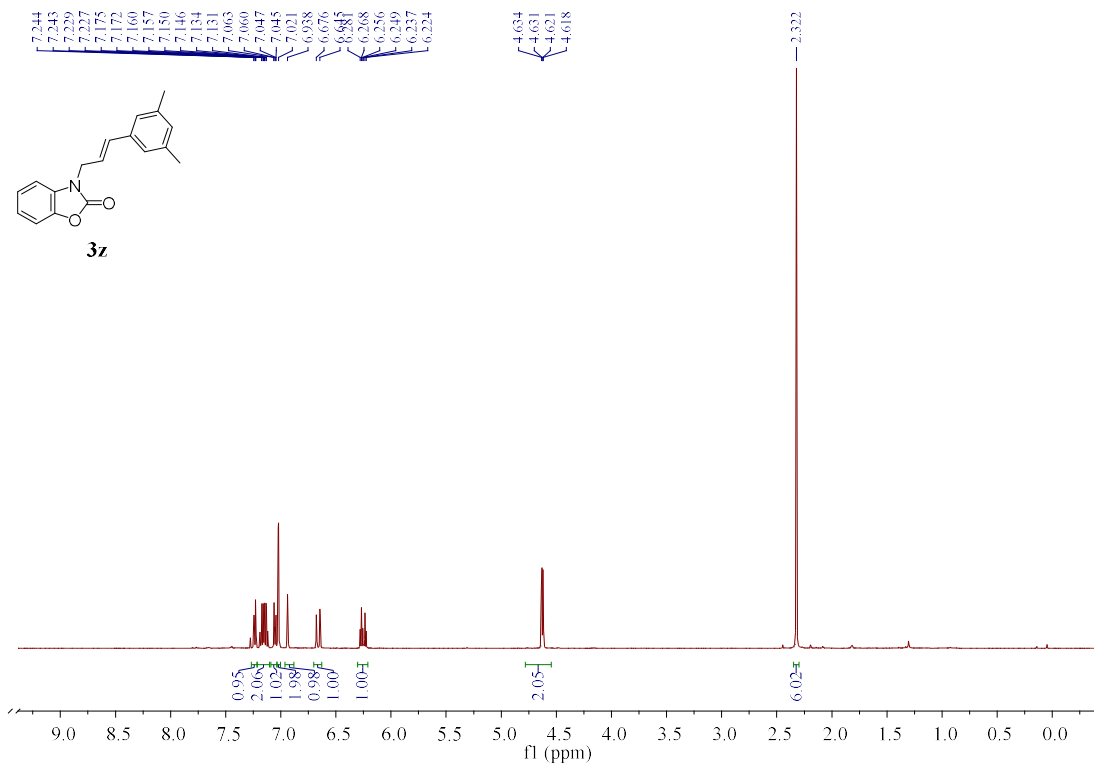

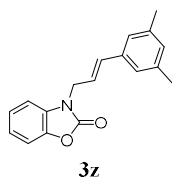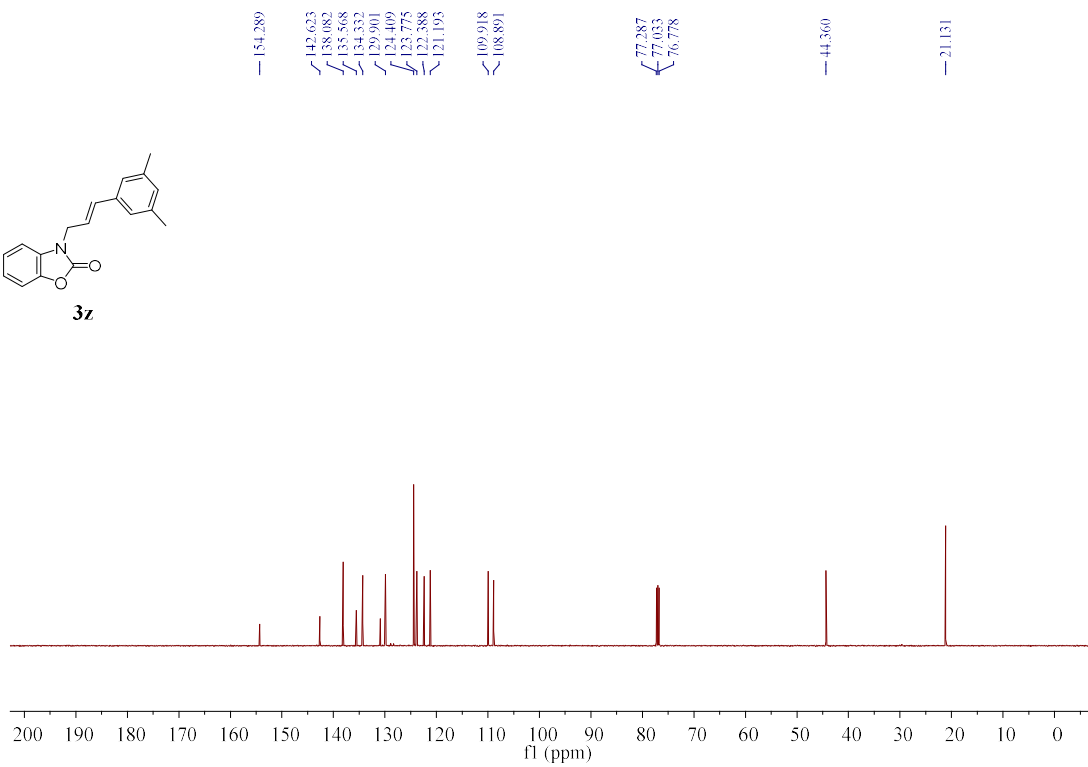

Supplement: c7ob01119a1.pdf [file c7ob01119a1.pdf]
